# Supplementary material for: The synthesis and structure of an amazing and stable carbonized material Cu-PC@OFM and its catalytic applications in water with mechanism explorations
Source: Royal Society of Chemistry journal article supplement (doi:10.1039/d1nj00861g), 2021-01-01

## Supporting Information

### The synthesis and structure of an amazing and stable carbonized material Cu-PC@OFM and catalytic applications in water with mechanism explorations

An-Qi Tian,<sup>a</sup> Xiang-Hao Luo,<sup>a</sup> Zhi-Lin Ren,<sup>b</sup> Jun Zhao,<sup>a</sup> and Long Wang<sup>\*a</sup>

<sup>a</sup> Key laboratory of inorganic nonmetallic crystalline and energy conversion materials, College of Materials and Chemical Engineering, China Three Gorges University, Yichang, Hubei 443002, China.

<sup>b</sup> College of Chemical Engineering, Hubei University of Arts and Science, Xiangyang, Hubei, 441053, China.

wanglongchem@ctgu.edu.cn (L. Wang)

### Table of contents

|                                                                                                       |       |
|-------------------------------------------------------------------------------------------------------|-------|
| 1. General information.....                                                                           | S2-S2 |
| 2. Details of experimental procedures.....                                                            | S2-S2 |
| 2.1. Synthesis of Cu-PC@OFM.....                                                                      | S2-S2 |
| 2.2. Typical procedure for the synthesis of <b>4a</b> .....                                           | S2-S2 |
| 2.3. Typical procedure for the synthesis of <b>6a</b> .....                                           | S2-S2 |
| 2.4. The original data of Leaching of the metal-catalysts experiments.....                            | S2-S3 |
| 2.5. Hot filtration test for the reaction of phenylenediamine and benzyl alcohols. ....               | S3-S3 |
| 3. Characterization Data for <b>4a-4o</b> and <b>6a-6o</b> .....                                      | S4-S8 |
| 4. Copies of <sup>1</sup> H and <sup>13</sup> C NMR spectras of compounds <b>4</b> and <b>6</b> ..... | S9-37 |

## 1. General Experiments.

All the obtained products were characterized  $^1\text{H}$  NMR spectra and  $^{13}\text{C}$  NMR spectra (400 or 100 MHz). Chemical shifts were reported in parts per million (ppm,  $\delta$ ) downfield from tetramethylsilane. Proton coupling patterns are described as singlet (s), doublet (d), triplet (t), multiplet (m); TLC was performed using commercially prepared 100-400 mesh silica gel plates (GF254), and visualization was effected at 254 nm; All the reagents were purchased from commercial sources and used without further purification.

## 2. Details of experimental procedures.

### 2.1. Synthesis of Cu-PC@OFM

Cu-MOF-199 was synthesized to the procedure reported previously using trimesic acid as a modulator. Thereafter, the mixed solution was filtered, washed, and dried to obtain blue crystals. Afterward, the obtained solid was then placed in a muffle furnace and purged with nitrogen, raised to 400 °C at the rate of 1 °C/min, and reacted for 5 hours. Thereafter, the temperature was lowered to room temperature to obtain dark brown solid powder.

### 2.2. Typical procedure for the synthesis of 4a

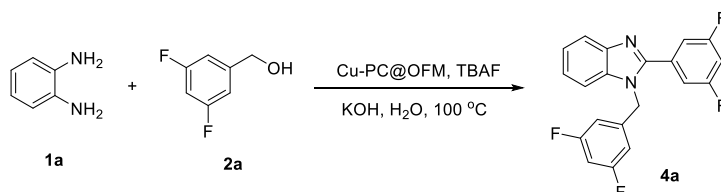

In a 25ml Schlenk tube, benzene-1,2-diamine **1a** (1 mmol), KOH (1.5 mmol), Cu-PC@OFM (10mg), TBAF (0.15 mmol) and (3,5-difluorophenyl)methanol **2a** (2.6 mmol) were added followed by H<sub>2</sub>O (4mL), and then the reaction mixture was heated at 100°C for 48h. After the reaction was completed, the solvent was removed under reduced pressure and the residue was purified by flash chromatography on silica gel (ethyl acetate/petroleum ether=1:20, v/v) to give 1-benzyl-2-aryl-1H-benzo[d]imidazole **4a**.

### 2.3. Typical procedure for the synthesis of 6a

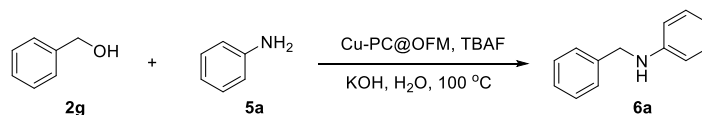

In a 25ml Schlenk tube, phenylmethanol **2g** (1.2 mmol), KOH (1.0 mmol), Cu-PC@OFM (10mg), TBAF (0.15 mmol) and aniline **5a** (1.0 mmol) were added followed by H<sub>2</sub>O (4mL), and then the reaction mixture was heated at 110°C for 48h. After the reaction was completed, the solvent was removed under reduced pressure and the residue was purified by flash chromatography on silica gel (ethyl acetate/petroleum ether=1:60, v/v) to give N-benzyl compound **6a**.

### 2.4. The original data of Leaching of the metal-catalysts experiments

### The test data

| Sample number | The sample quality $m_0$ (g) | Constant volume $V_0$ (mL) | Test element | The concentration of elements in the solution $C_0$ (mg/L) | Dilution multiple | Element concentration of digestion solution / original sample solution $C_1$ (mg/L) | Element content of sample C (mg/kg) | Element content of sample W(%) |
|---------------|------------------------------|----------------------------|--------------|------------------------------------------------------------|-------------------|-------------------------------------------------------------------------------------|-------------------------------------|--------------------------------|
| 1             | 0.9229                       | 10                         | Cu           | 0.7238                                                     | 1                 | 0.7238                                                                              | 7.84                                | 0.0008%                        |

### 2.5. Hot filtration test for the reaction of phenylenediamine and benzyl alcohols

| Entry | Catalyst         | Time(h) | Yield |
|-------|------------------|---------|-------|
| 1     | With catalyst    | 12      | 53    |
| 2     | After filtration | 24      | 53    |

Conditions: **1a** (1 mmol), **2a** (2.6 mmol), Cu-PC@OFM (10 mg), KOH (1.0 equiv.), TBAF (15 mol%), H<sub>2</sub>O (4 mL), 100 °C.

### 3. Characterization Data

#### 3.1 Characterization Data for 4a-4o

##### 4a: 1-(3,5-difluorobenzyl)-2-(3,5-difluorophenyl)-1H-benzo[d]imidazole

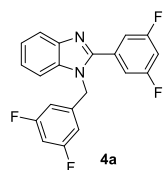

Yield: 82%. <sup>1</sup>H NMR (400 MHz, CDCl<sub>3</sub>) δ(ppm) 7.88(d, *J*=8.0 Hz, 1H, Ar-H), 7.38-7.29(m, 2H, Ar-H), 7.22-7.19(m, 3H, Ar-H), 6.97-6.91(m, 1H, Ar-H), 6.79-6.73(m, 1H, Ar-H), 6.60(d, *J*=5.6 Hz, 2H, Ar-H), 5.43(s, 2H, CH<sub>2</sub>). <sup>13</sup>C NMR (101 MHz, CDCl<sub>3</sub>) δ(ppm) 164.83 (d, JCF = 12.7 Hz), 164.25 (d, JCF = 12.8 Hz), 162.34 (d, JCF = 12.7 Hz), 161.76 (d, JCF = 12.8 Hz), 151.23, 142.90, 139.86, 135.84, 132.69, 124.08, 123.43, 120.53, 112.37, 112.10, 110.14, 109.06, 108.79, 105.59, 103.73, 47.63.

##### 4b: 1-(2,5-difluorobenzyl)-2-(2,5-difluorophenyl)-1H-benzo[d]imidazole

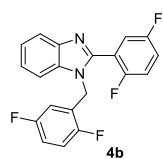

Yield: 67%. <sup>1</sup>H NMR (400 MHz, CDCl<sub>3</sub>) δ(ppm) 7.87(d, *J*=7.2 Hz, 1H, Ar-H), 7.40-7.36(m, 1H, Ar-H), 7.37-7.30(m, 2H, Ar-H), 7.28-7.24(m, 1H, Ar-H), 7.21-7.16(m, 2H, Ar-H), 7.03-6.97(m, 1H, Ar-H), 6.94-6.88(m, 1H, Ar-H), 6.49-6.45(m, 1H, Ar-H), 5.36(s, 2H, CH<sub>2</sub>). <sup>13</sup>C NMR (101 MHz, CDCl<sub>3</sub>) δ(ppm) 159.91 (dd, JCF = 6.1, 2.3 Hz), 157.23 (dd, JCF = 14.9, 2.5 Hz), 157.48 (dd, JCF = 7.3, 2.2 Hz), 154.81 (dd, JCF = 12.0, 2.6 Hz), 147.91, 143.23, 135.12, 123.82, 123.07, 120.47, 117.48, 117.32, 116.73, 116.57, 116.20, 116.05, 115.03, 114.80, 110.33, 42.14.

##### 4c: 1-(3,4-difluorobenzyl)-2-(3,4-difluorophenyl)-1H-benzo[d]imidazole

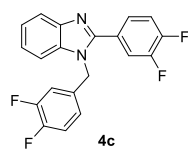

Yield: 85%. <sup>1</sup>H NMR (400 MHz, CDCl<sub>3</sub>) δ(ppm) 7.89(d, *J*=4.8 Hz Hz, 1H, Ar-H), 7.55-7.50(m, 1H, Ar-H), 7.38-7.34(m, 2H, Ar-H), 7.33-7.29(m, 1H, Ar-H), 7.24-7.21(m, 2H, Ar-H), 7.18-7.11 (m, 1H, Ar-H), 6.93-6.88(m, 1H, Ar-H), 6.80(d, *J*=12.0 Hz, 1H, Ar-H), 5.39(s, 2H, CH<sub>2</sub>). <sup>13</sup>C NMR (101 MHz, CDCl<sub>3</sub>) δ(ppm) 152.89 (d, JCF = 12.4 Hz), 152.12 (d, JCF=12.4 Hz), 150.36 (d, JCF = 12.5 Hz), 149.56 (d, JCF = 13.1 Hz), 148.69, 142.61, 135.63, 125.52, 123.91, 123.42, 121.87, 120.22, 118.72, 118.54, 118.30, 118.11, 117.93, 115.03, 110.21, 47.37.

##### 4d: 1-(4-fluorobenzyl)-2-(4-fluorophenyl)-5-methyl-1H-benzo[d]imidazole

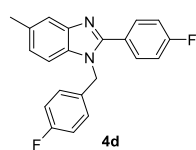

Yield: 87%. <sup>1</sup>H NMR (400 MHz, CDCl<sub>3</sub>) δ(ppm) 7.72 (d, *J*=8.0Hz, 1H, Ar-H), 7.63-7.58(m, 2H, Ar-H), 7.14-7.08(m, 3H, Ar-H), 7.06(s, 1H, Ar-H), 7.02-6.97 (m, 4H, Ar-H), 5.32(s, 2H, CH<sub>2</sub>), 2.45(d, *J*=20.0Hz, 3H, CH<sub>3</sub>). <sup>13</sup>C NMR (101 MHz, CDCl<sub>3</sub>) δ(ppm) 164.75 (d, JCF = 2.9 Hz), 162.27 (d, JCF = 2.8 Hz), 160.87, 152.43, 143.29, 141.07, 136.06, 133.21, 132.43, 131.00, 127.47, 126.20, 124.35, 119.42, 116.02, 115.85, 115.64, 109.97, 47.50, 21.66.

##### 4e: 1-(3-chlorobenzyl)-2-(3-chlorophenyl)-1H-benzo[d]imidazole

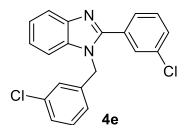

Yield: 80%. <sup>1</sup>H NMR (400 MHz, CDCl<sub>3</sub>) δ(ppm) 7.88(d, *J*=8.0Hz, 1H, Ar-H), 7.72-7.71(m, 1H, Ar-H), 7.50-7.45(m, 2H, Ar-H), 7.39(d, *J*=8.0Hz, 1H, Ar-H), 7.36-7.32(m, 1H, Ar-H), 7.30-7.26(m, 3H, Ar-H), 7.24-7.21(m, 1H, Ar-H), 7.11(s, 1H, Ar-H), 6.94-6.92(d, *J*=8.0Hz, 1H, Ar-H), 5.40(s, 2H, CH<sub>2</sub>). <sup>13</sup>C NMR (101 MHz, CDCl<sub>3</sub>) δ(ppm) 152.46, 143.06, 138.17, 135.91, 135.17, 134.94, 131.64, 130.45,

130.11, 130.02, 129.48, 128.25, 127.02, 126.19, 124.05, 123.61, 123.07, 120.29, 110.29, 47.86.

**4f: 1-(2-chlorobenzyl)-2-(2-chlorophenyl)-1H-benzo[d]imidazole**

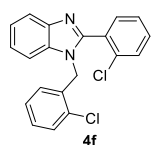

Yield: 71%. <sup>1</sup>H NMR (400 MHz, CDCl<sub>3</sub>) δ(ppm) 7.89(d, *J*=8.0Hz, 1H, Ar-H), 7.51(d, *J*=8.0Hz, 1H, Ar-H), 7.46-7.41(m, 2H, Ar-H), 7.34-7.29(m, 3H, Ar-H), 7.28-7.25(m, 1H, Ar-H), 7.22(s, 1H, Ar-H), 7.20-7.15(m, 1H, Ar-H), 7.07-7.04(m, 1H, Ar-H), 6.64-6.62(d, *J*=8.0Hz, 1H, Ar-H), 5.36(s, 2H, CH<sub>2</sub>). <sup>13</sup>C NMR (101 MHz, CDCl<sub>3</sub>) δ(ppm) 151.47, 143.03, 134.78, 134.33, 133.26, 132.35, 132.10, 131.37, 129.87, 129.65, 129.55, 128.94, 127.73, 127.07, 126.91, 123.34, 122.68, 120.34, 110.48, 45.67.

**4g: 1-benzyl-2-phenyl-1H-benzo[d]imidazole**

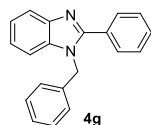

Yield: 84%. <sup>1</sup>H NMR (400 MHz, CDCl<sub>3</sub>) δ(ppm) 7.87(d, *J*=8.0Hz, 1H, Ar-H), 7.69-7.67(m, 2H, Ar-H), 7.46-7.43(m, 3H, Ar-H), 7.34-7.28(m, 4H, Ar-H), 7.22-7.18(m, 2H, Ar-H), 7.10-7.08(d, *J*=8.0Hz, 2H, Ar-H), 5.44(s, 2H, CH<sub>2</sub>). <sup>13</sup>C NMR (101 MHz, CDCl<sub>3</sub>) δ(ppm) 154.08, 143.12, 136.33, 136.00, 130.03, 129.83, 129.20, 128.97, 128.67, 127.70, 125.91, 122.97, 122.60, 119.92, 110.45, 48.30.

**4h: 1-(2-methylbenzyl)-2-(o-tolyl)-1H-benzo[d]imidazole**

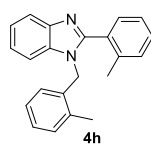

Yield: 72%. <sup>1</sup>H NMR (400 MHz, CDCl<sub>3</sub>) δ(ppm) 7.87(d, *J*=8.0Hz, 1H, Ar-H), 7.32(d, *J*=8.0Hz, 1H, Ar-H), 7.28-7.24(m, 3H, Ar-H), 7.21-7.18(m, 1H, Ar-H), 7.16-7.13(m, 2H, Ar-H), 7.10-7.07(m, 2H, Ar-H), 6.99-6.95(m, 1H, Ar-H), 6.63-6.61(d, *J*=8.0Hz, 1H, Ar-H), 5.15(s, 2H, CH<sub>2</sub>), 2.22(s, 3H, CH<sub>3</sub>), 2.11(s, 3H, CH<sub>3</sub>). <sup>13</sup>C NMR (101 MHz, CDCl<sub>3</sub>) δ(ppm) 153.65, 142.92, 138.10, 134.85, 134.59, 133.81, 130.34, 130.14, 129.62, 129.57, 127.29, 126.10, 125.81, 125.38, 122.59, 122.10, 119.78, 110.31, 45.52, 19.56, 18.78.

**4i: 1-(4-methylbenzyl)-2-(p-tolyl)-1H-benzo[d]imidazole**

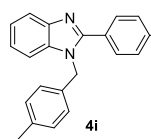

Yield: 72%. <sup>1</sup>H NMR (400 MHz, CDCl<sub>3</sub>) δ(ppm) 7.85(d, *J*=8.0Hz, 1H, Ar-H), 7.58(d, *J*=8.0Hz, 2H, Ar-H), 7.29-7.25(m, 1H, Ar-H), 7.24(s, 1H, Ar-H), 7.22-7.17(m, 3H, Ar-H), 7.11-7.09(d, *J*=8.0Hz, 2H, Ar-H), 6.98-6.96(d, *J*=8.0Hz, 2H, Ar-H), 5.36(s, 2H, CH<sub>2</sub>), 2.37(s, 3H, CH<sub>3</sub>), 2.30(s, 3H, CH<sub>3</sub>). <sup>13</sup>C NMR (101 MHz, CDCl<sub>3</sub>) δ(ppm) 154.15, 143.03, 139.85, 137.26, 135.96, 133.32, 129.53, 129.28, 129.02, 127.06, 125.76, 122.68, 122.39, 119.65, 110.37, 48.01, 21.25, 20.91.

**4j: 5-methyl-1-(4-methylbenzyl)-2-(p-tolyl)-1H-benzo[d]imidazole**

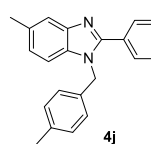

Yield: 86%. <sup>1</sup>H NMR (400 MHz, CDCl<sub>3</sub>) δ(ppm) 7.56-7.54(m, 2H, Ar-H), 7.18-7.15(m, 2H, Ar-H), 7.08-7.03(m, 3H, Ar-H), 7.00-6.96(m, 1H, Ar-H), 6.93-6.90(m, 3H, Ar-H), 5.26(s, 2H, CH<sub>2</sub>), 2.40(d, *J*=8.0Hz, 1H, CH<sub>3</sub>), 2.32(s, 3H, CH<sub>3</sub>), 2.26(d, 3H, CH<sub>3</sub>). <sup>13</sup>C NMR (101 MHz, CDCl<sub>3</sub>) δ(ppm) 153.87, 153.50, 143.28, 141.08, 139.48, 139.42, 136.94, 136.15, 133.97, 133.36, 132.45, 131.76, 129.36, 129.05, 128.75, 127.12, 125.50, 123.83, 119.31, 119.04, 109.99, 109.72, 47.64, 21.49, 21.04, 20.72.

**4k: 2-(thiophen-2-yl)-1-(thiophen-2-ylmethyl)-1H-benzo[d]imidazole**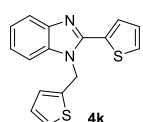

Yield: 74%. <sup>1</sup>H NMR (400 MHz, DMSO) δ(ppm) 7.82(d, *J*=8.0Hz, 1H, Ar-H), 7.74-7.68(m, 3H, Ar-H), 7.40(d, *J*=8.0Hz, 1H, Ar-H), 7.31-7.24(m, 3H, Ar-H), 7.04(d, *J*=4.0Hz, 1H, Ar-H), 6.97-6.95(m, 1H, Ar-H), 5.94(s, 2H, CH<sub>2</sub>). <sup>13</sup>C NMR (101 MHz, DMSO) δ(ppm) 146.71, 142.36, 139.27, 135.78, 132.01, 129.60, 128.33, 127.81, 126.99, 126.01, 125.89, 122.86, 122.52, 118.90, 110.74, 43.00.

**4m: 1-(2-methoxybenzyl)-2-(2-methoxyphenyl)-1H-benzo[d]imidazole**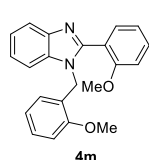

Yield: 70%. <sup>1</sup>H NMR (400 MHz, CDCl<sub>3</sub>) δ(ppm) 7.87(d, *J*=4.0Hz, 1H, Ar-H), 7.66(d, *J*=8.0Hz, 2H, Ar-H), 7.33-7.28(m, 1H, Ar-H), 7.23-7.21(m, 2H, Ar-H), 7.05-6.97(m, 4H, Ar-H), 6.86(d, *J*=12.0Hz, 2H, Ar-H), 5.38(s, 1H, CH<sub>2</sub>), 3.85(s, 3H, CH<sub>3</sub>), 3.79(s, 3H, CH<sub>3</sub>). <sup>13</sup>C NMR (101 MHz, CDCl<sub>3</sub>) δ(ppm) 160.91, 159.05, 153.99, 143.07, 136.00, 130.61, 128.39, 127.13, 122.63, 122.41, 122.37, 119.60, 114.34, 114.10, 110.33, 55.25, 55.17, 47.77.

**4n: 1-(4-chlorobenzyl)-2-(4-chlorophenyl)-5-methyl-1H-benzo[d]imidazole**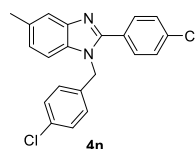

Yield: 89%. <sup>1</sup>H NMR (400 MHz, CDCl<sub>3</sub>) δ(ppm) 7.74-7.60(m, 1H, Ar-H), 7.56-7.54(m, 2H, Ar-H), 7.40-7.38(m, 2H, Ar-H), 7.28-7.26(m, 2H, Ar-H), 7.14-7.03(m, 1H, Ar-H), 7.00-6.96(m, 3H, Ar-H), 5.32(s, 1H, CH<sub>2</sub>), 2.48-2.40(m, 3H, CH<sub>3</sub>). <sup>13</sup>C NMR (101 MHz, CDCl<sub>3</sub>) δ(ppm) 152.55, 152.18, 143.26, 141.07, 136.08, 134.67, 133.90, 133.57, 133.41, 132.57, 130.17, 129.18, 128.90, 128.38, 127.06, 124.77, 124.49, 119.49, 109.92, 47.46, 21.69.

**4o: 1-(4-ethylbenzyl)-2-(4-ethylphenyl)-5-methyl-1H-benzo[d]imidazole**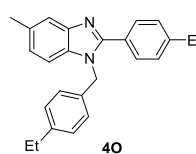

Yield: 83%. <sup>1</sup>H NMR (400 MHz, CDCl<sub>3</sub>) δ(ppm) 7.73(d, *J*=8.0Hz, 1H, Ar-H), 7.61-7.58(m, 2H, Ar-H), 7.25-7.22(m, 2H, Ar-H), 7.14-7.08(m, 3H, Ar-H), 7.01-6.97(m, 3H, Ar-H), 5.34(s, 2H, CH<sub>2</sub>), 2.69-2.59(m, 4H, 2CH<sub>2</sub>), 2.39(s, 3H, CH<sub>3</sub>), 1.25-1.17(m, 6H, 2CH<sub>3</sub>). <sup>13</sup>C NMR (101 MHz, CDCl<sub>3</sub>) δ(ppm) 154.11, 153.74, 145.90, 143.49, 143.42, 141.22, 136.31, 134.11, 133.76, 132.64, 131.97, 129.03, 128.34, 128.04, 127.45, 125.74, 123.98, 119.48, 119.20, 110.16, 47.90, 28.31, 21.67, 15.17.

**3.2 Characterization Data for 6a-6o****N-benzylaniline (6a)**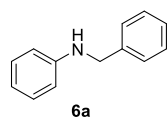

<sup>1</sup>H NMR (CDCl<sub>3</sub>, 400 MHz) δ (ppm) 7.37-7.31 (m, 4H, Ar-H), 7.29-7.26 (m, 1H, Ar-H), 7.17 (t, *J* = 8.0 Hz, 2H, Ar-H), 6.71 (t, *J* = 8.0 Hz, 1H, Ar-H), 6.63 (d, *J* = 7.6 Hz, 2H, Ar-H), 4.32 (s, 2H, CH<sub>2</sub>), 4.01 (s, 1H, NH); <sup>13</sup>C NMR (100 MHz, CDCl<sub>3</sub>) δ (ppm) 148.10, 139.38, 129.23, 128.60, 127.47, 127.19, 117.51, 112.79, 48.26.

**N-benzyl-4-methylaniline (6b)**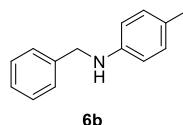

<sup>1</sup>H NMR (CDCl<sub>3</sub>, 400 MHz) δ (ppm) 7.37-7.22 (m, 5H, Ar-H), 6.98 (d, *J* = 8.4 Hz, 2H, Ar-H), 6.57-6.54 (m, 2H, Ar-H), 4.30 (s, 2H, CH<sub>2</sub>), 3.89 (s, 1H, NH), 2.23 (s, 3H, CH<sub>3</sub>); <sup>13</sup>C NMR (100 MHz, CDCl<sub>3</sub>) δ (ppm) 145.88, 139.61, 129.71, 128.56, 127.45, 127.11, 126.70, 112.94, 48.58, 20.36.

**N-benzyl-4-fluoroaniline (6c)**

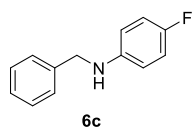

$^1\text{H NMR}$  ( $\text{CDCl}_3$ , 400 MHz)  $\delta$  (ppm) 7.34-7.23 (m, 5H, Ar-H), 6.86 (t,  $J = 8.8$  Hz, 2H, Ar-H), 6.57-6.53 (m, 2H, Ar-H), 4.27 (s, 2H,  $\text{CH}_2$ ), 3.88 (s, 1H, NH);  $^{13}\text{C NMR}$  (100MHz,  $\text{CDCl}_3$ )  $\delta$  (ppm) 157.15, 154.81, 144.54, 139.31, 128.66, 127.48, 127.30, 115.77, 115.54, 113.76 (d, JCF = 7.4 Hz), 49.02.

**N-benzyl-3-chloroaniline (6d)**

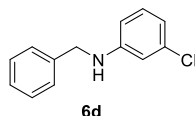

$^1\text{H NMR}$  ( $\text{CDCl}_3$ , 400 MHz)  $\delta$  (ppm) 7.35-7.23 (m, 5H, Ar-H), 7.05 (t,  $J = 8.0$  Hz, 1H, Ar-H), 6.68-6.65 (m, 1H, Ar-H), 6.60 (t,  $J = 2.2$  Hz, 1H, Ar-H), 6.78 (dd,  $J = 1.6, 8.0$  Hz, 1H, Ar-H), 4.29 (s, 2H,  $\text{CH}_2$ ), 4.09 (s, 1H, NH);  $^{13}\text{C NMR}$  (100 MHz,  $\text{CDCl}_3$ )  $\delta$  (ppm) 149.16, 138.69, 134.96, 130.17, 128.69, 127.42, 127.40, 117.35, 112.42, 111.08, 48.03.

**N-(4-methylbenzyl)aniline (6e)**

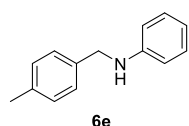

$^1\text{H NMR}$  ( $\text{CDCl}_3$ , 400 MHz)  $\delta$  (ppm) 7.27-7.13 (m, 6H, Ar-H), 6.70 (t,  $J = 7.2$  Hz, 1H, Ar-H), 6.62 (d,  $J = 7.6$  Hz, 2H, Ar-H), 4.27 (s, 2H,  $\text{CH}_2$ ), 3.96 (s, 1H, NH), 2.34 (s, 3H,  $\text{CH}_3$ );  $^{13}\text{C NMR}$  (100 MHz,  $\text{CDCl}_3$ )  $\delta$  (ppm) 148.17, 136.83, 136.30, 129.27, 129.21, 127.48, 117.43, 112.77, 48.01, 21.07.

**N-(2-methylbenzyl)aniline (6f)**

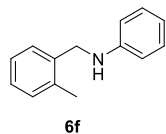

$^1\text{H NMR}$  ( $\text{CDCl}_3$ , 400 MHz)  $\delta$  (ppm) 7.42-7.24 (m, 6H, Ar-H), 6.80 (t,  $J = 7.6$  Hz, 1H, Ar-H), 6.71 (d,  $J = 7.6$  Hz, 2H, Ar-H), 4.34 (s, 2H,  $\text{CH}_2$ ), 3.90 (s, 1H, NH);  $^{13}\text{C NMR}$  (100 MHz,  $\text{CDCl}_3$ )  $\delta$  (ppm) 148.24, 136.95, 136.31, 130.37, 129.24, 128.21, 127.38, 126.12, 117.40, 112.63, 46.32, 18.91.

**N-(4-chlorobenzyl)aniline (6g)**

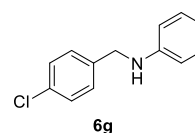

$^1\text{H NMR}$  (400 MHz,  $\text{CDCl}_3$ )  $\delta$  (ppm) 7.30 (s, 4H, Ar-H), 7.20 – 7.15 (m, 2H, Ar-H), 7.11 – 7.02 (m, 1H, Ar-H), 6.72 (t,  $J = 7.3$  Hz, 1H, Ar-H), 6.60 (d,  $J = 8.5$  Hz, 2H, Ar-H), 4.31 (s, 2H,  $\text{CH}_2$ ).  $^{13}\text{C NMR}$  (100 MHz,  $\text{CDCl}_3$ )  $\delta$  (ppm) 147.80, 137.97, 132.85, 129.27, 128.81, 128.73, 117.78, 114.09, 113.76, 112.86, 47.58.

**N-(4-methoxybenzyl)aniline (6h)**

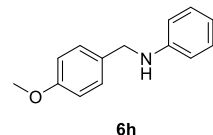

$^1\text{H NMR}$  ( $\text{CDCl}_3$ , 400 MHz)  $\delta$  (ppm) 7.30-7.15 (m, 4H, Ar-H), 6.89-6.86 (m, 2H, Ar-H), 6.71 (t,  $J = 7.6$  Hz, 1H, Ar-H), 6.63 (d,  $J = 7.6$  Hz, 2H, Ar-H), 4.24 (s, 2H,  $\text{CH}_2$ ), 3.94 (s, 1H, NH), 3.79 (s, 3H,  $\text{OCH}_3$ );  $^{13}\text{C NMR}$  (100 MHz,  $\text{CDCl}_3$ )  $\delta$  (ppm) 158.79, 148.15, 131.35, 129.21, 128.77, 117.45, 113.96, 112.78, 55.26, 47.73.

**N-(4-fluorobenzyl)aniline (6i)**

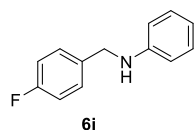

$^1\text{H NMR}$  ( $\text{CDCl}_3$ , 400 MHz)  $\delta$  (ppm) 7.34-7.15 (m, 4H, Ar-H), 7.01 (t,  $J = 8.8$  Hz, 3H, Ar-H), 6.72 (t,  $J = 7.2$  Hz, 1H, Ar-H), 6.61 (d,  $J = 7.6$  Hz, 2H, Ar-H), 4.28 (s, 2H,  $\text{CH}_2$ ), 4.00 (s, 1H, NH);  $^{13}\text{C NMR}$  (100 MHz,  $\text{CDCl}_3$ )  $\delta$  (ppm) 163.21, 160.77, 147.88, 135.06, 129.25, 128.95 (d, JCF = 7.9 Hz), 117.68, 115.50, 115.29, 112.81, 47.54.

**N-(3-chlorobenzyl)aniline (6j)**

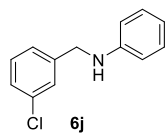

$^1\text{H NMR}$  (400 MHz,  $\text{CDCl}_3$ )  $\delta$  (ppm) 7.41 (s, 1H, Ar-H), 7.40 – 7.29 (m, 3H, Ar-H), 7.21-7.25 (m, 2H, Ar-H), 6.81 (d,  $J=7.4\text{Hz}$ , 1H, Ar-H), 6.50 (d,  $J=8.6\text{Hz}$ , 2H, Ar-H), 4.20(s, 2H,  $\text{CH}_2$ ), 4.12(s, NH);  $^{13}\text{C NMR}$  (100 MHz,  $\text{CDCl}_3$ )  $\delta$  (ppm) 147.81, 147.78, 134.56, 129.80, 129.34, 127.50, 127.42, 125.44, 117.92, 112.90, 47.82.

**4-methyl-N-(pyridin-4-ylmethyl)aniline (6k)**

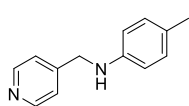

6k

$^1\text{H NMR}$  ( $\text{CDCl}_3$ , 400 MHz)  $\delta$  (ppm) 8.53 (d,  $J = 6.0$  Hz, 2H, Py-H), 7.28 (d,  $J = 6.0$  Hz, 2H, Py-H), 6.97 (d,  $J = 8.0$  Hz, 2H, Ar-H), 6.50 (d, 2H,  $J = 8.4$  Hz, Ar-H), 4.35 (s, 2H,  $\text{CH}_2$ ), 4.11 (s, 1H, NH), 4.02 (s, 1H, NH), 2.23 (s, 3H,  $\text{CH}_3$ );  $^{13}\text{C NMR}$  (100 MHz,  $\text{CDCl}_3$ )  $\delta$  (ppm) 149.87, 149.20, 145.10, 129.79, 127.25, 122.04, 112.94, 47.30, 20.32.

**N-benzhydrylaniline (6l)**

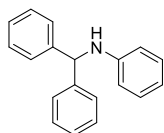

6l

$^1\text{H NMR}$  ( $\text{CDCl}_3$ , 400 MHz)  $\delta$  (ppm) 7.39-7.29 (m, 8H, Ar-H), 7.27-7.23 (m, 3H, Ar-H), 6.70-6.66 (m, 1H, Ar-H), 5.09 (s, 1H, CH), 4.22 (s, 1H, NH);  $^{13}\text{C NMR}$  (100 MHz,  $\text{CDCl}_3$ )  $\delta$  (ppm) 147.30, 142.88, 129.09, 128.72, 127.41, 127.32, 120.59, 117.60, 113.42, 63.00.

**N-(1-phenylpropyl)aniline (6m)**

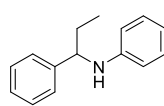

6m

$^1\text{H NMR}$  ( $\text{CDCl}_3$ , 400 MHz)  $\delta$  (ppm) 7.34-7.28 (m, 4H, Ar-H), 7.23-7.19 (m, 1H, Ar-H), 7.09-7.05 (m, 2H, Ar-H), 4.22 (t,  $J = 6.8$  Hz, 1H, CH), 4.05 (s, 1H, NH), 1.84-1.79 (m, 2H,  $\text{CH}_2$ ), 0.95 (t,  $J = 7.6$  Hz, 3H,  $\text{CH}_3$ );  $^{13}\text{C NMR}$  (100 MHz,  $\text{CDCl}_3$ )  $\delta$  (ppm) 147.50, 143.90, 129.05, 128.46, 126.85, 126.45, 117.09, 113.22, 59.70, 31.63, 10.79.

**N-isopropylaniline (6n)**

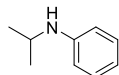

6n

$^1\text{H NMR}$  ( $\text{CDCl}_3$ , 400 MHz)  $\delta$  (ppm) 7.18-7.14 (m, 2H, Ar-H), 6.69-6.57 (m, 3H, Ar-H), 3.65-3.59 (m, 1H, CH), 3.45-3.39 (m, 1H, NH), 1.20 (d,  $J = 6.4$  Hz, 6H,  $\text{CH}_3$ );  $^{13}\text{C NMR}$  (100 MHz,  $\text{CDCl}_3$ )  $\delta$  (ppm) 147.42, 129.23, 116.92, 113.20, 44.16, 30.98, 22.97.

**N-benzyl-naphthalen-1-amine (6o)**

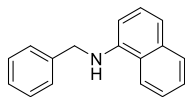

6o

$^1\text{H NMR}$  (400 MHz,  $\text{CDCl}_3$ )  $\delta$  (ppm) 7.80 (d,  $J = 8.0$  Hz, 2H, Ar-H), 7.35 (ddd,  $J = 52.9, 33.1, 12.3$  Hz, 9H, Ar-H), 6.62 (d,  $J = 7.1$  Hz, 1H, Ar-H), 4.69 (s, 1H, NH), 4.48 (s, 2H,  $\text{CH}_2$ );  $^{13}\text{C NMR}$  (100 MHz,  $\text{CDCl}_3$ )  $\delta$  (ppm) 143.14, 139.03, 134.22, 128.68, 127.70, 127.36, 126.57, 125.72, 124.72, 123.29, 119.85, 117.58, 104.68, 48.55.



## 4. Copies of $^1\text{H}$ and $^{13}\text{C}$ NMR spectra

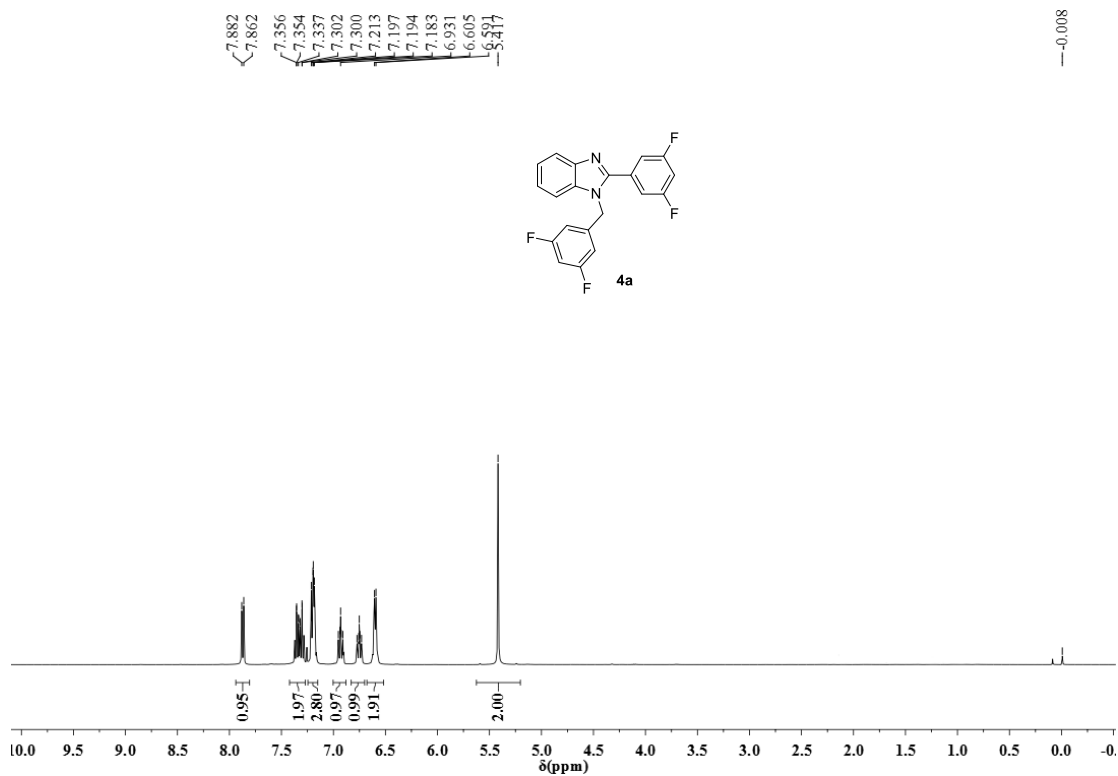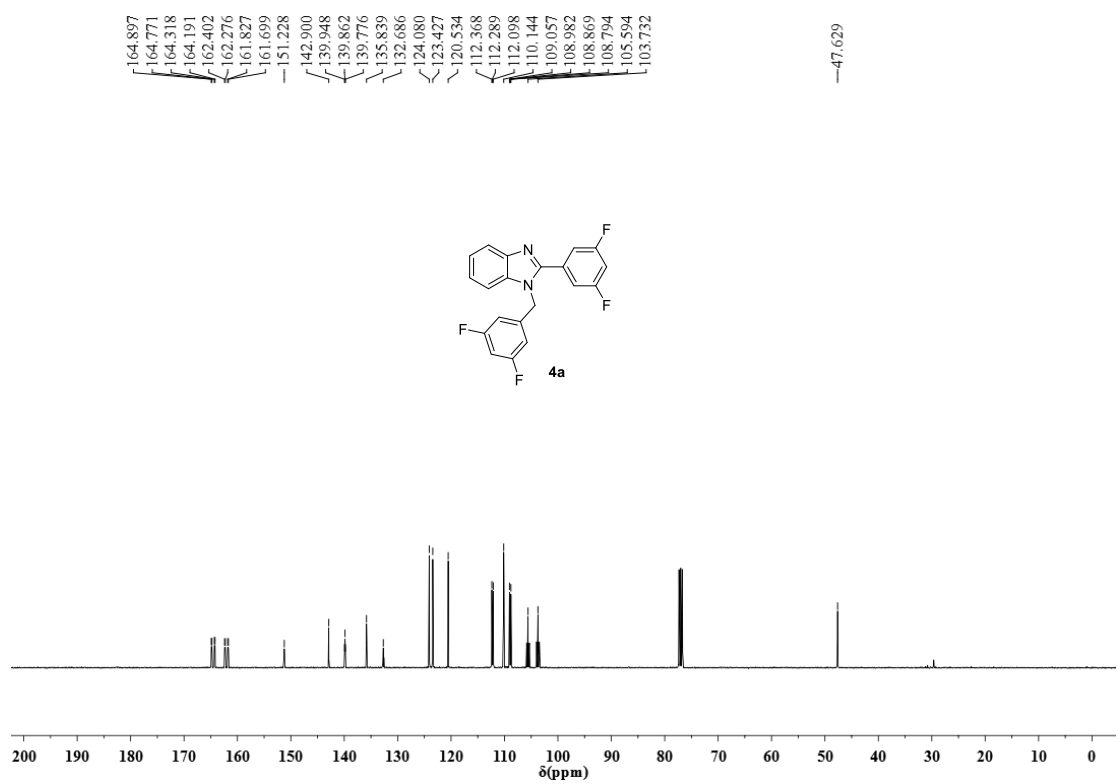

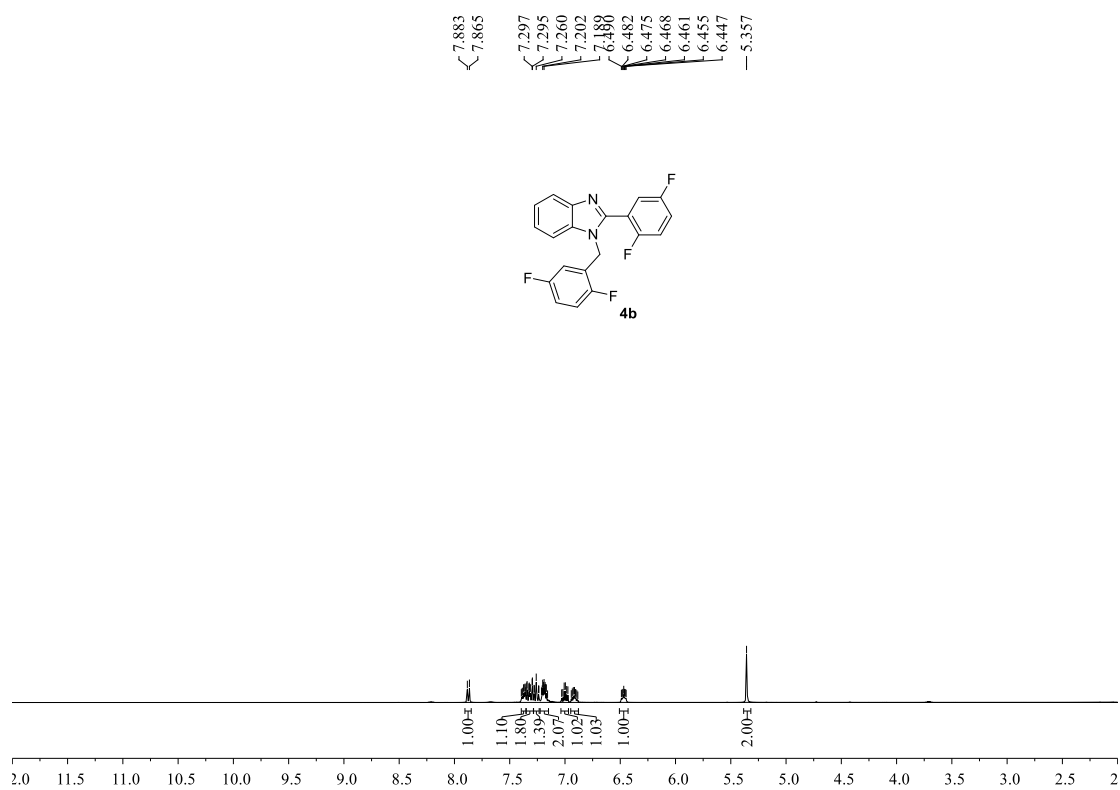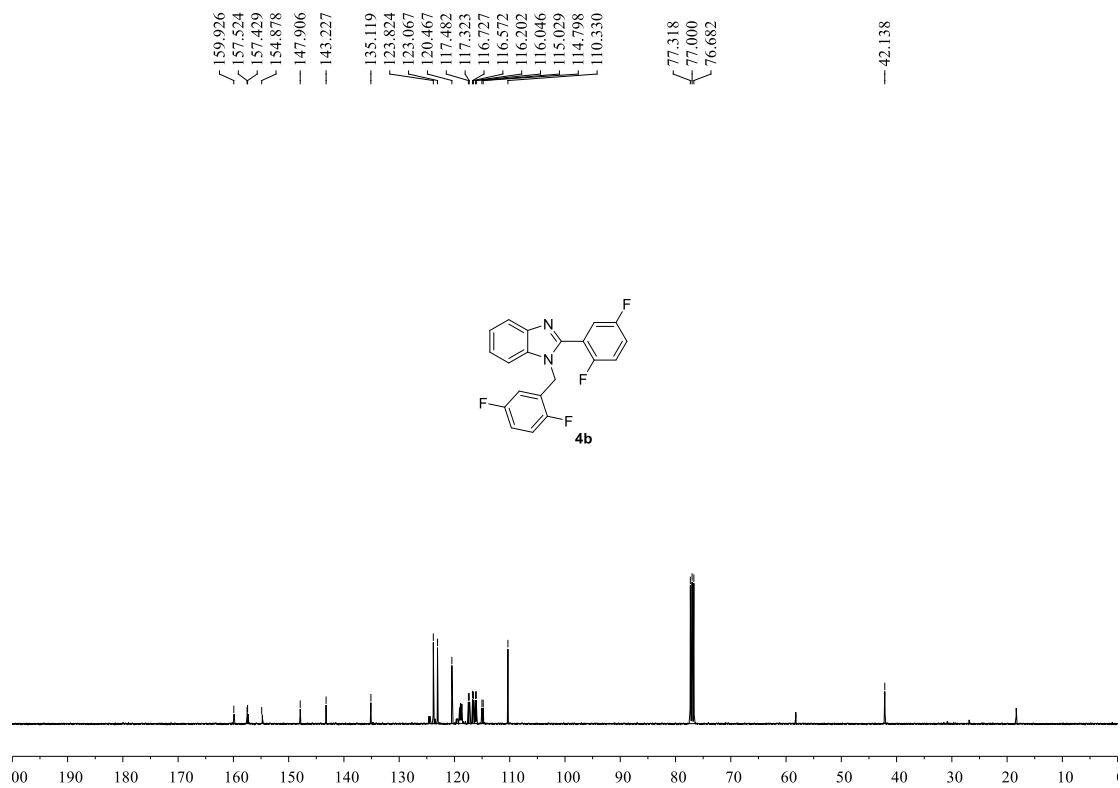

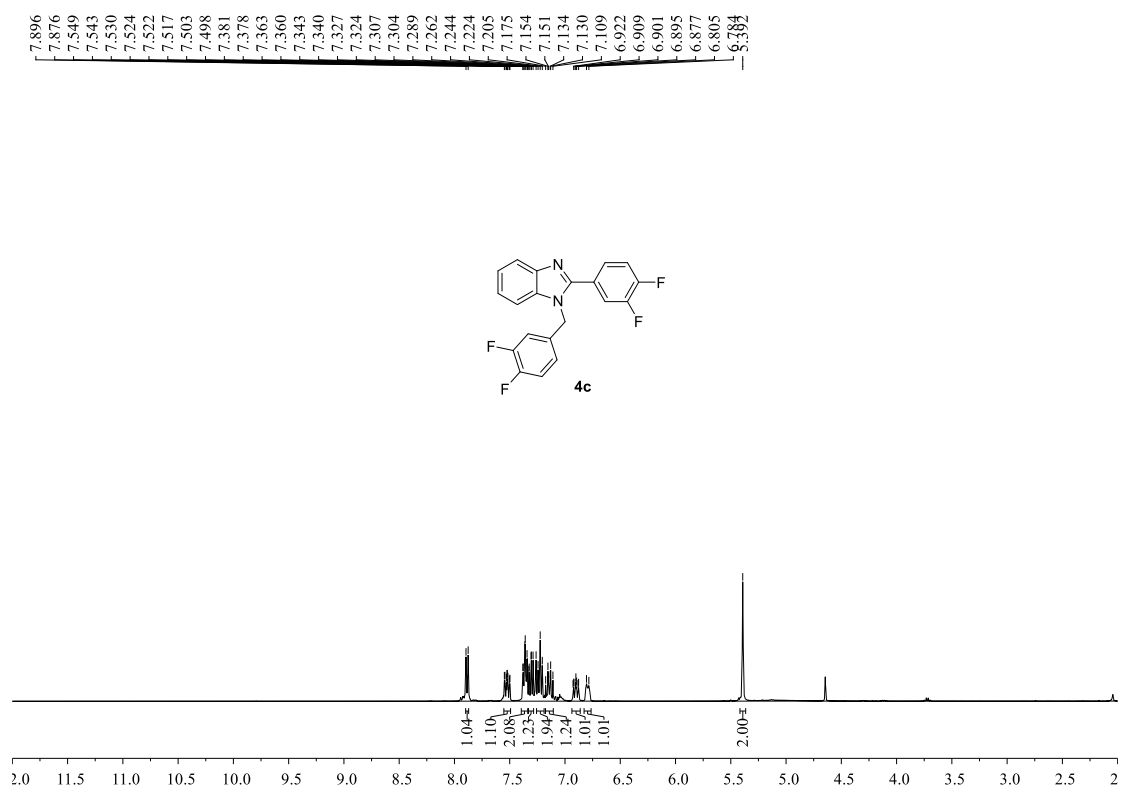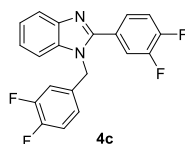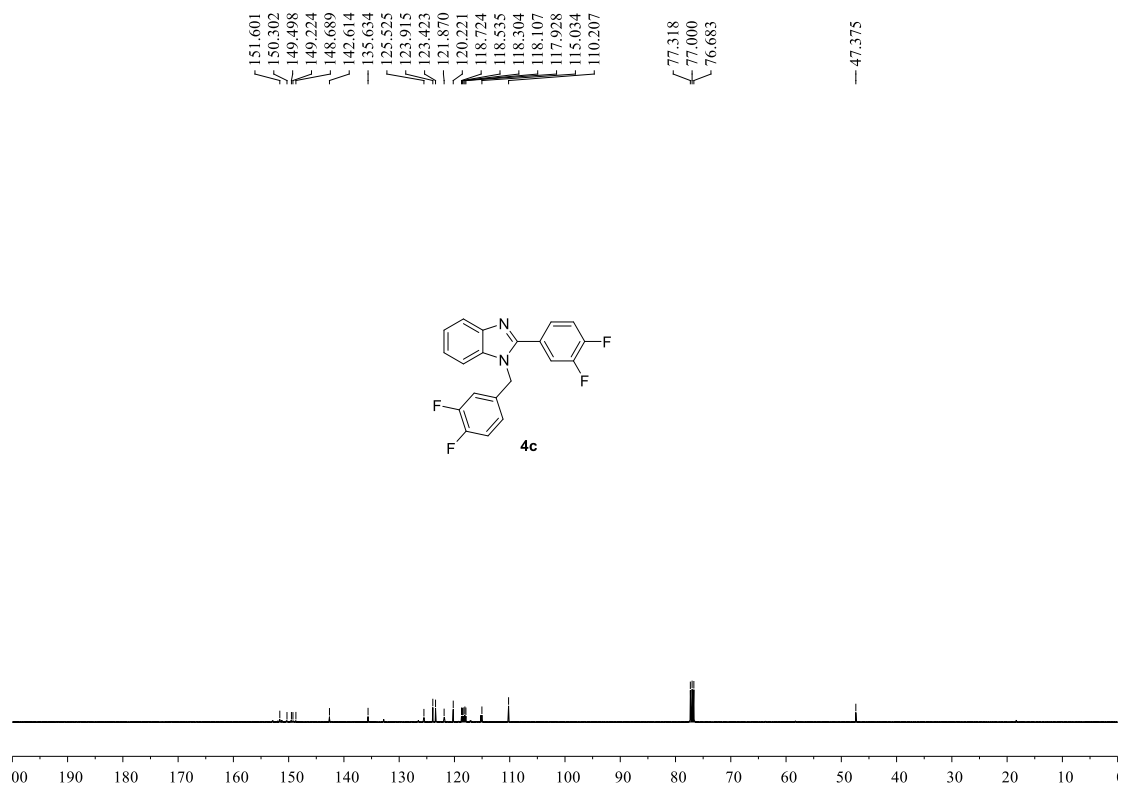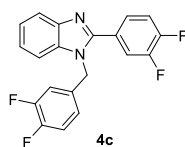

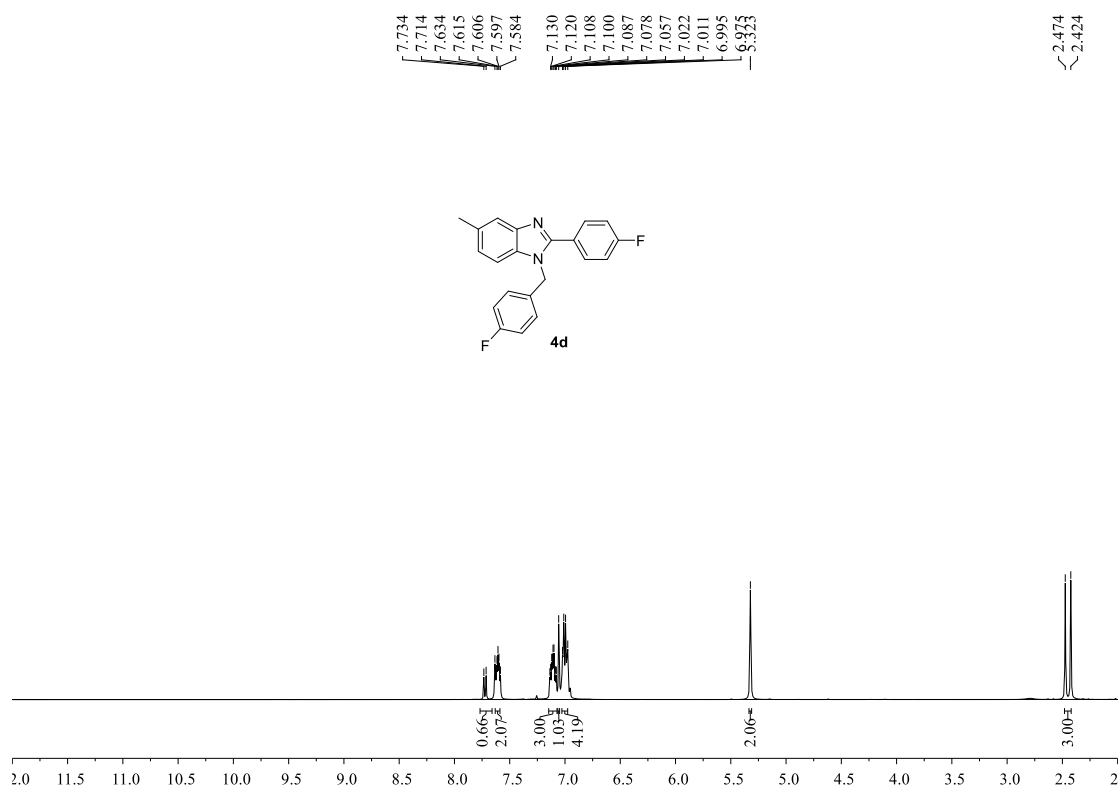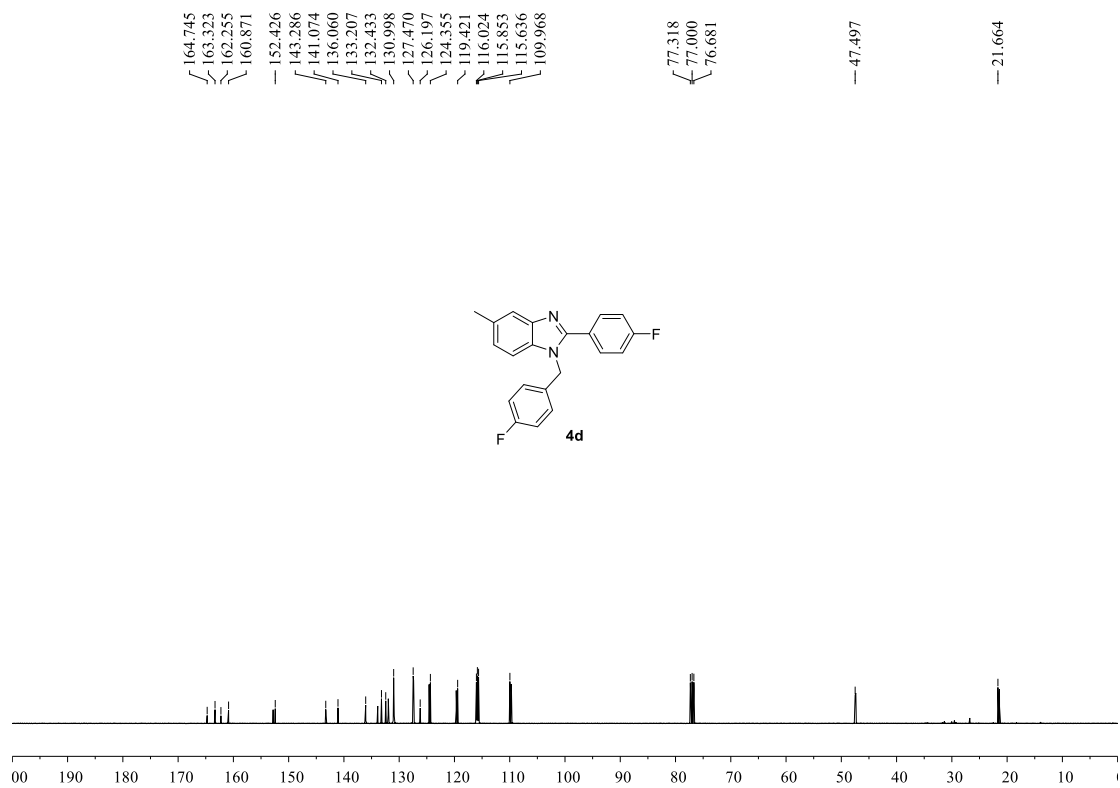

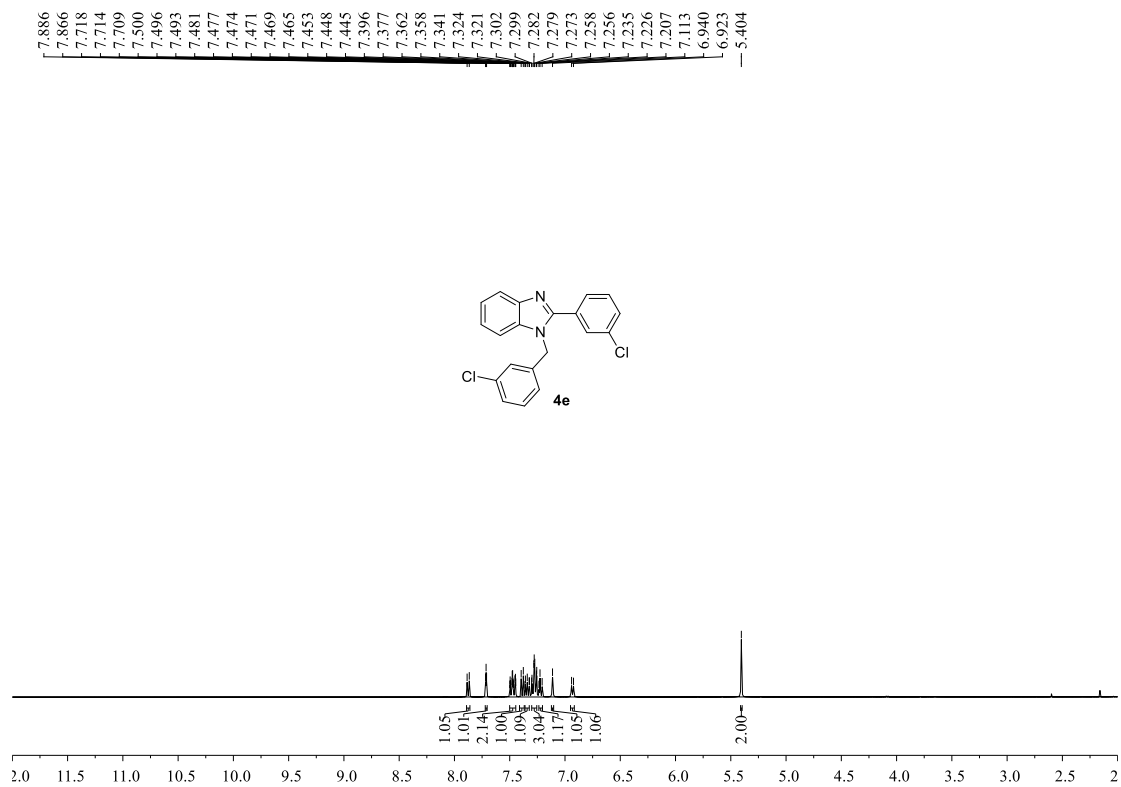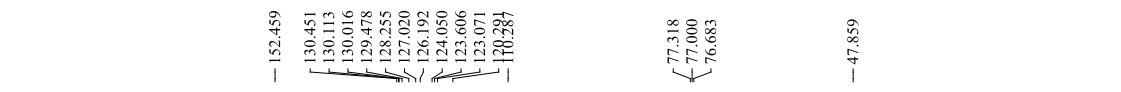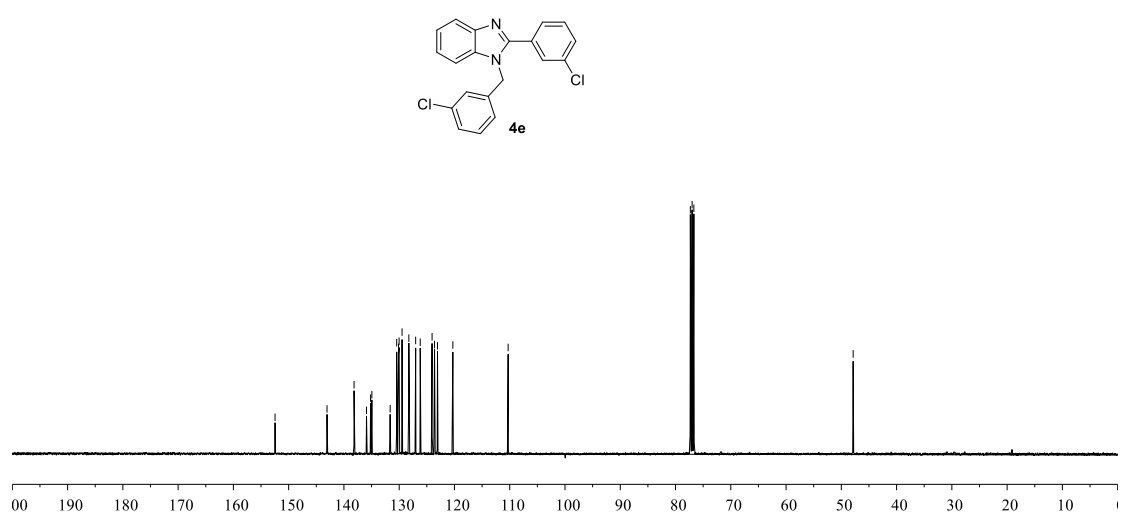

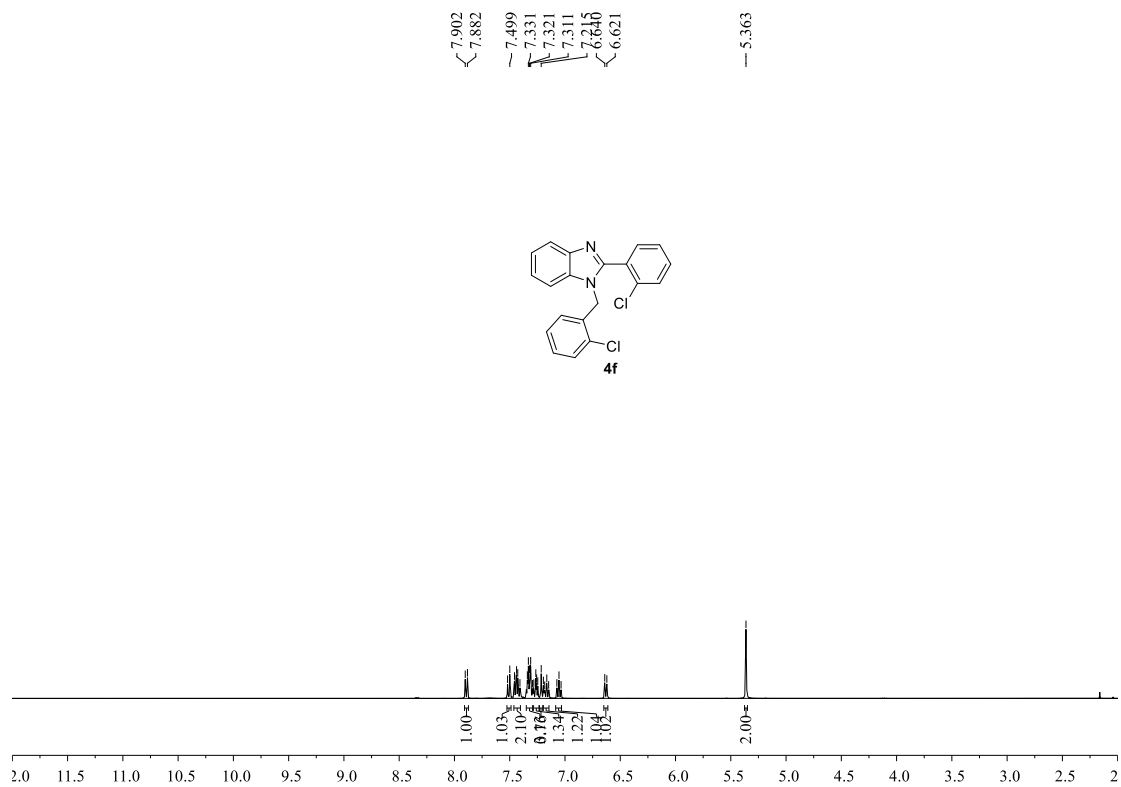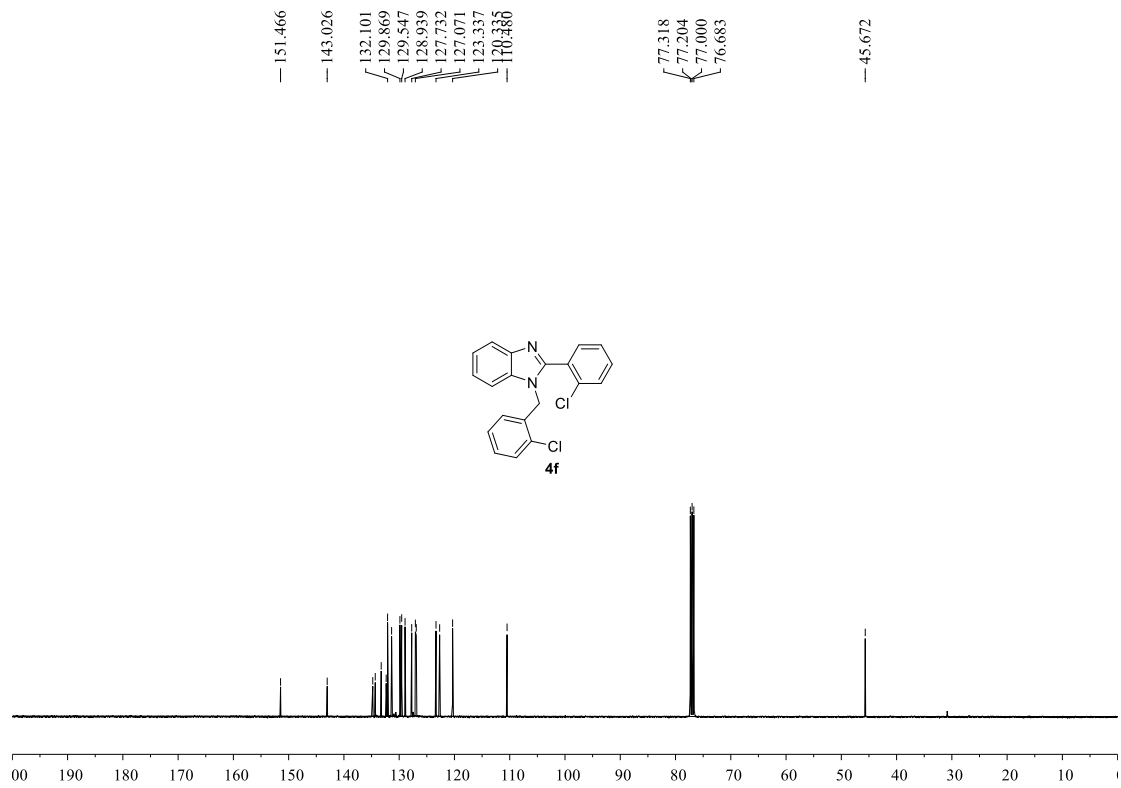

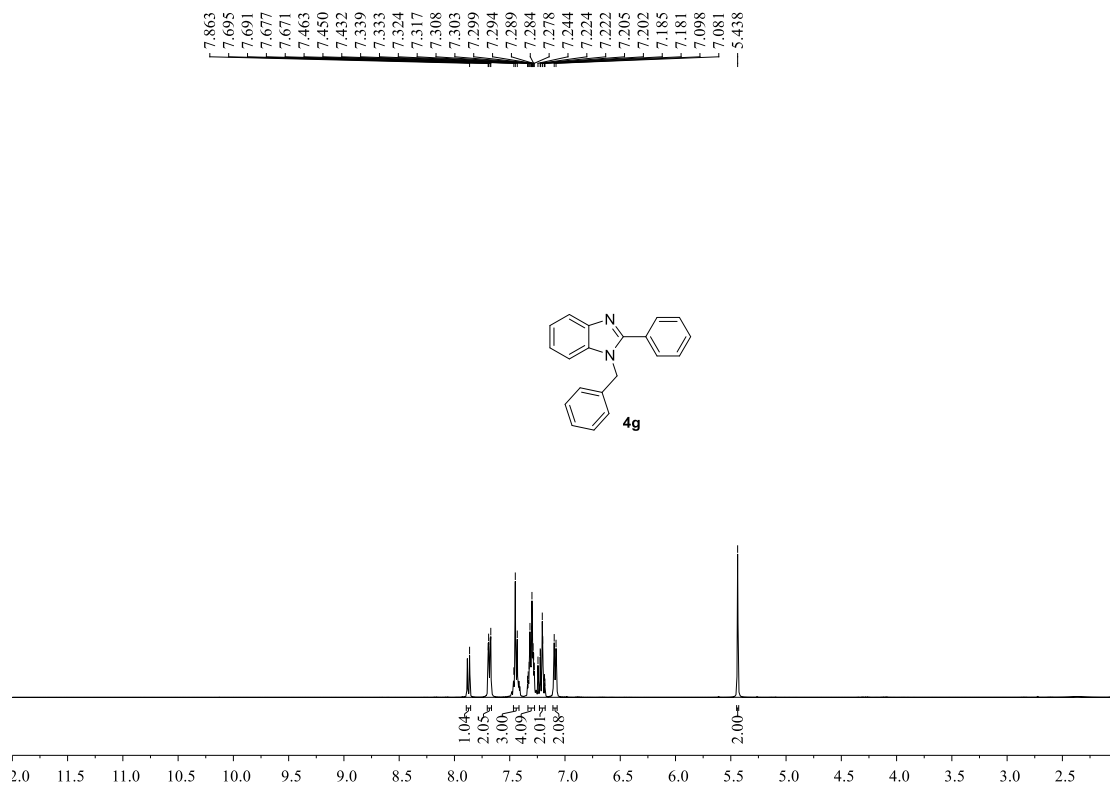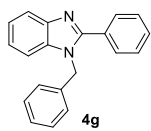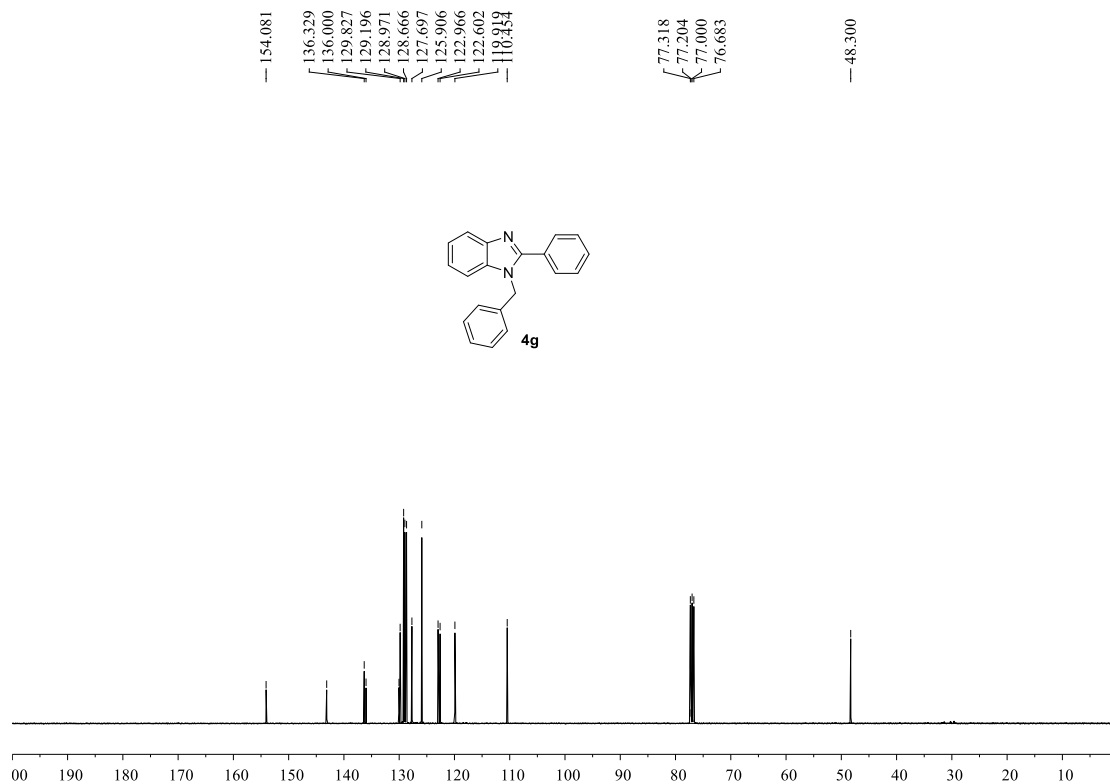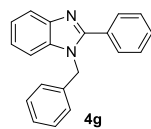

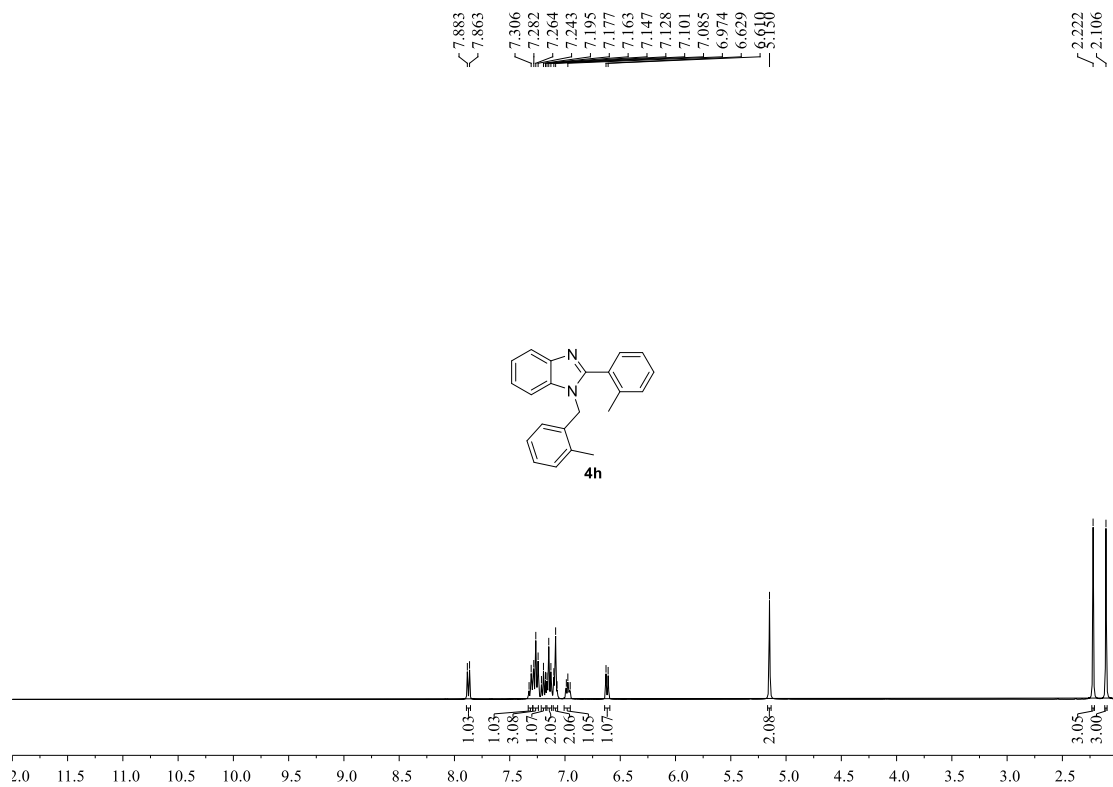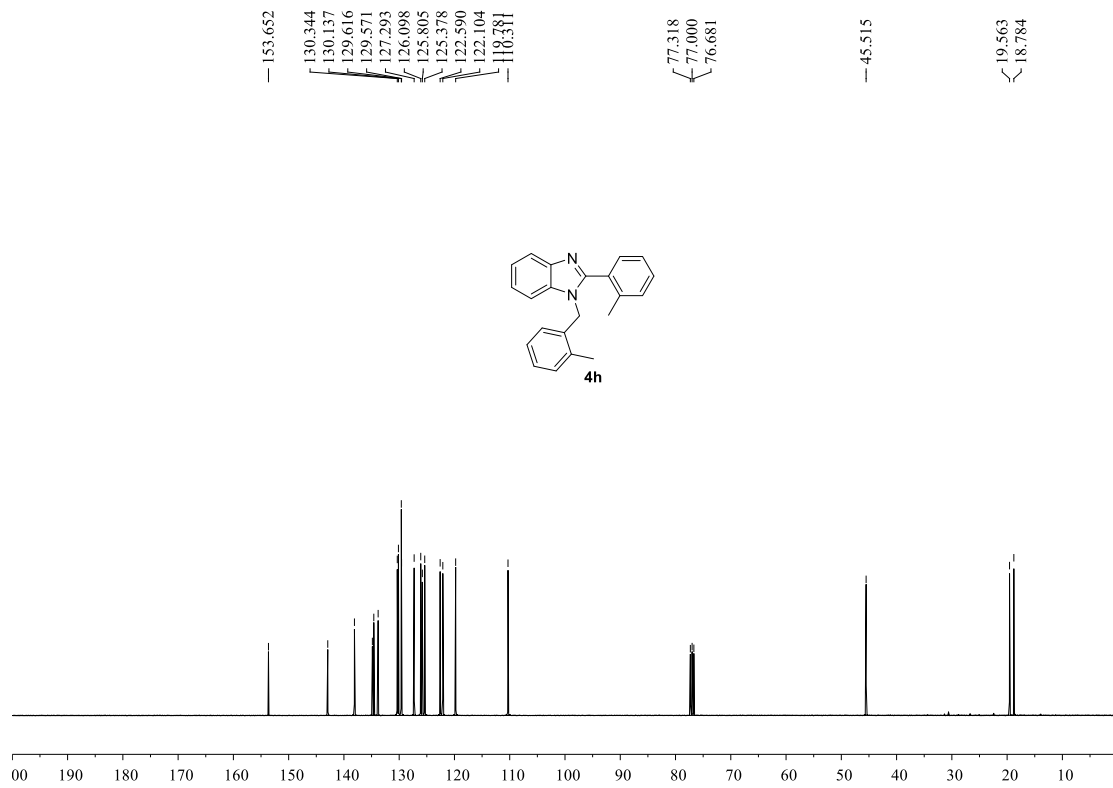



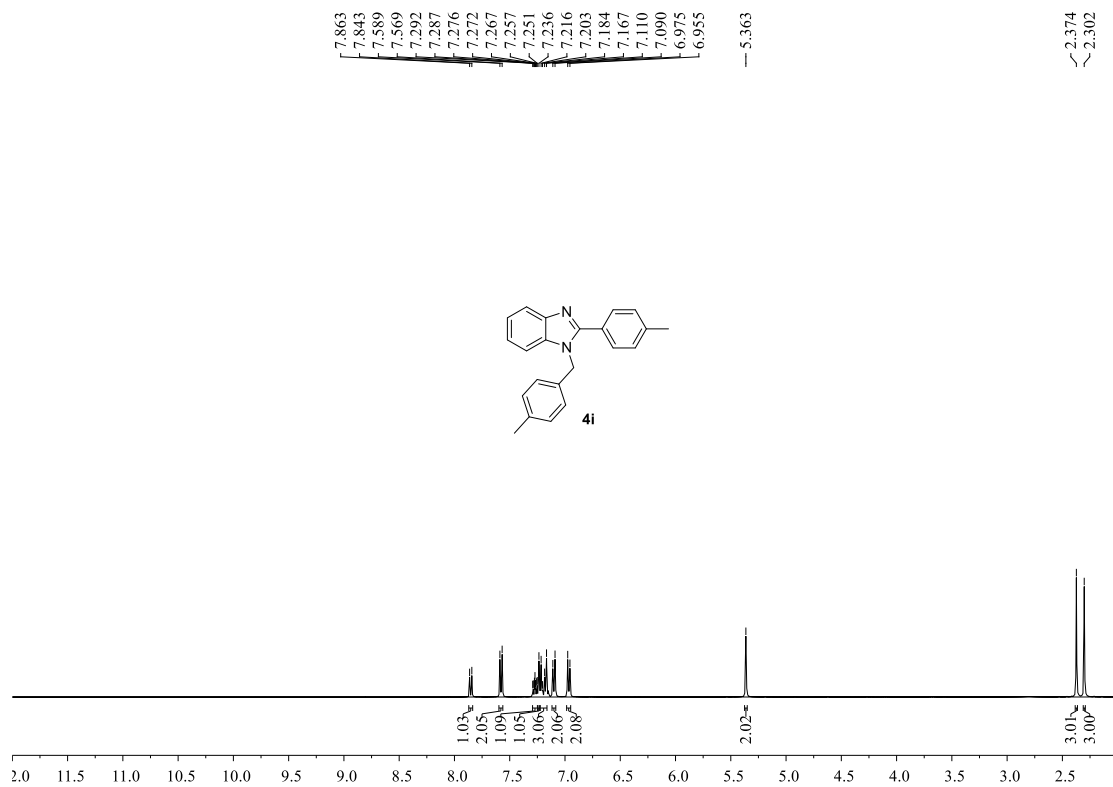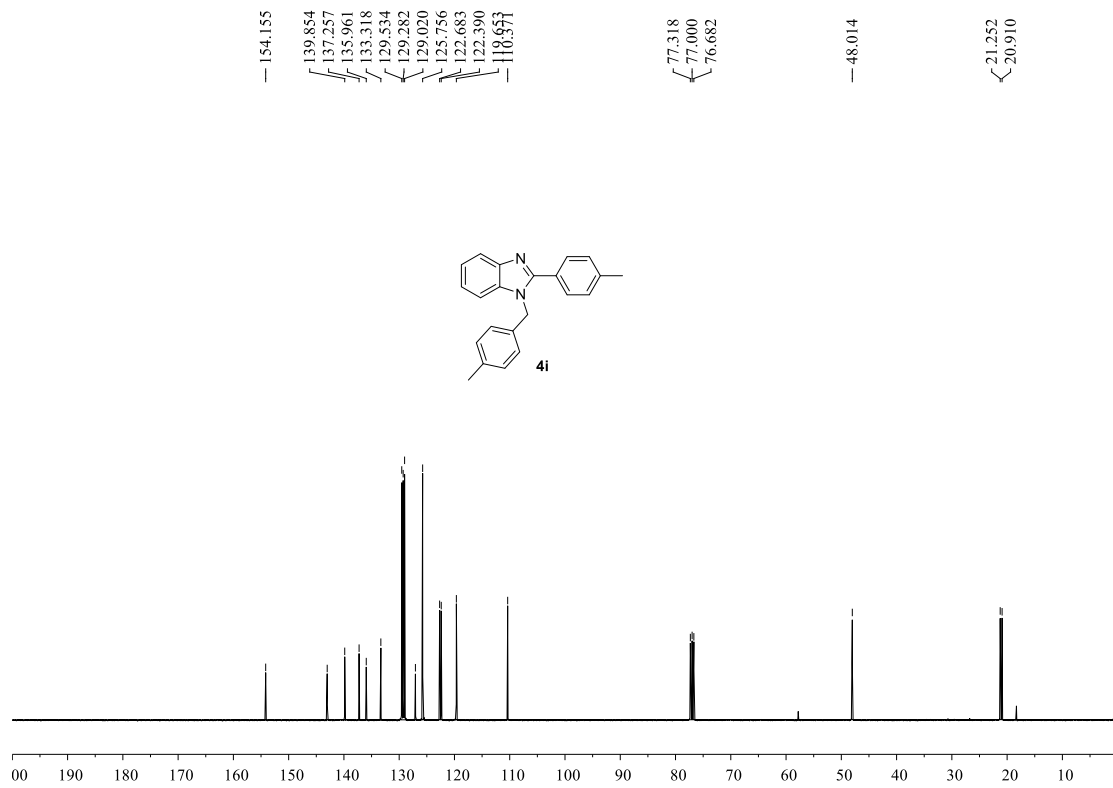

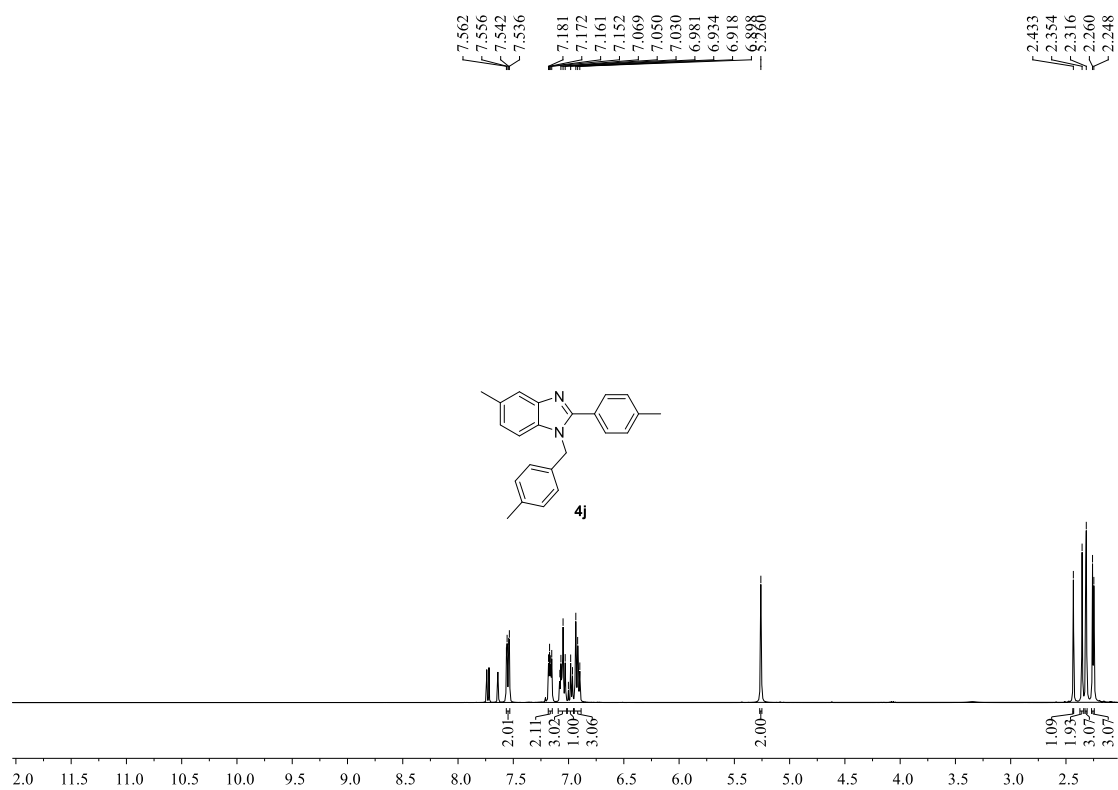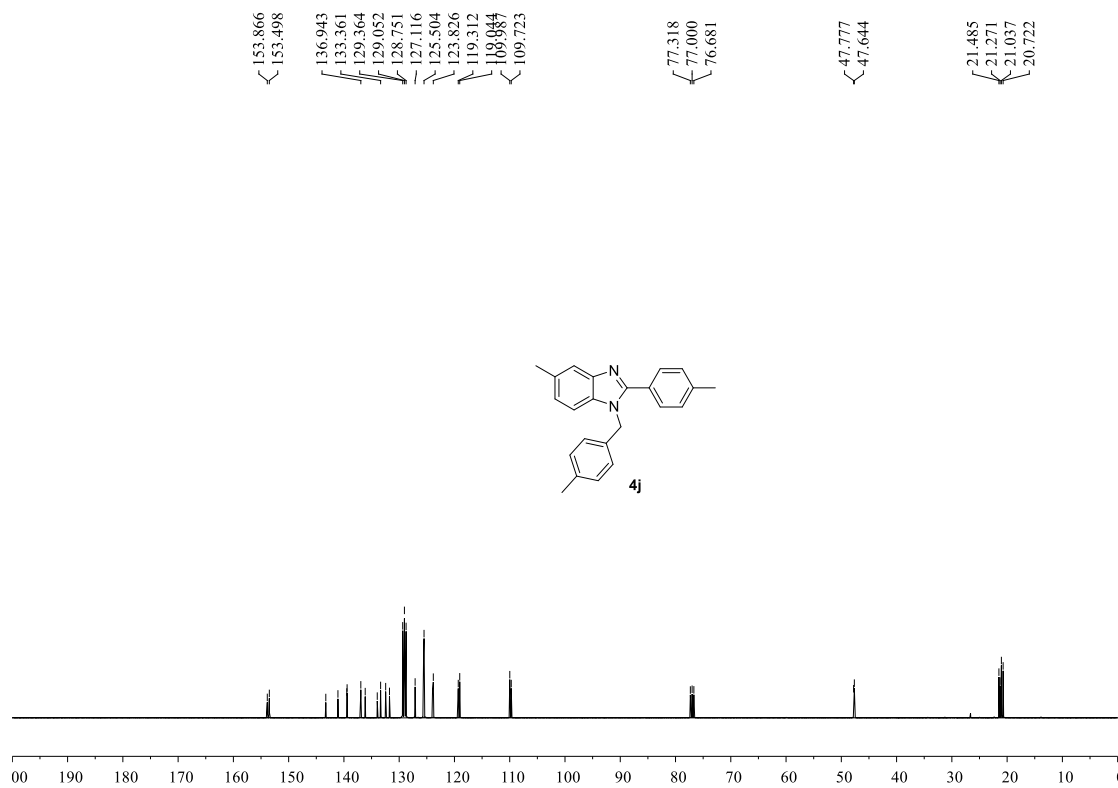

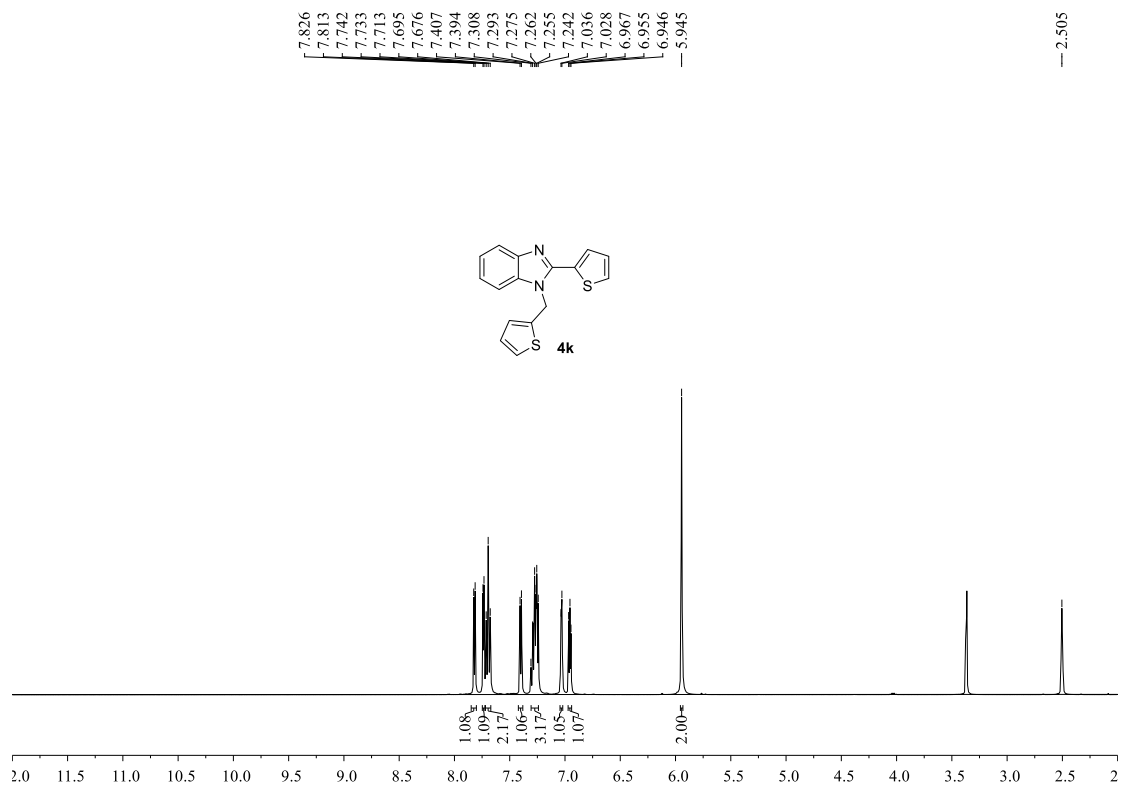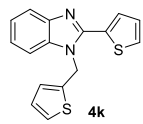

— 2.505

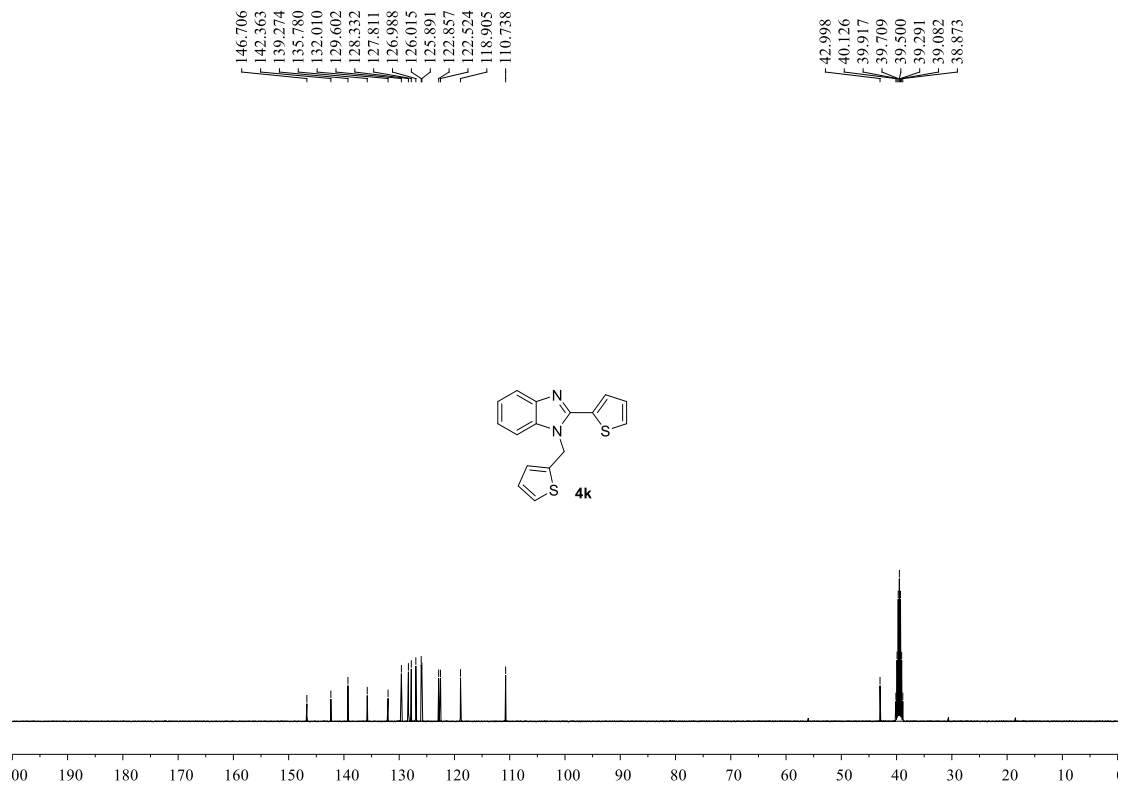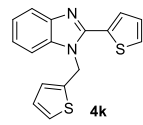

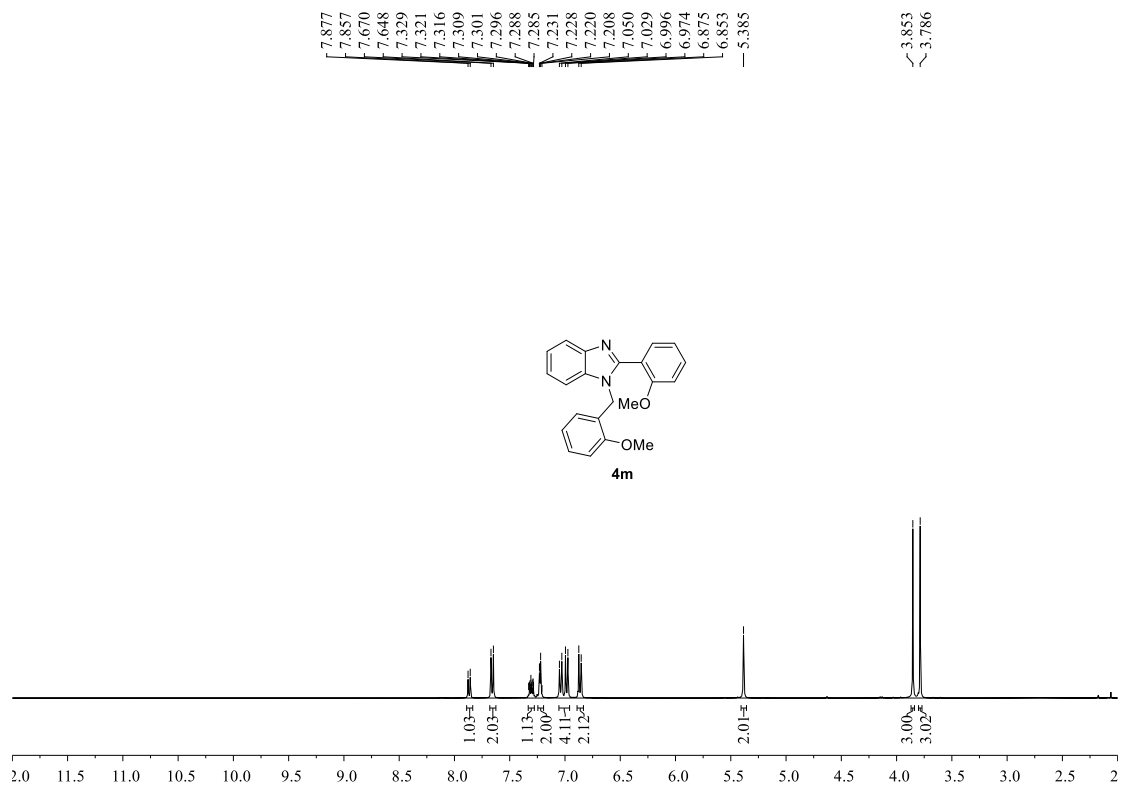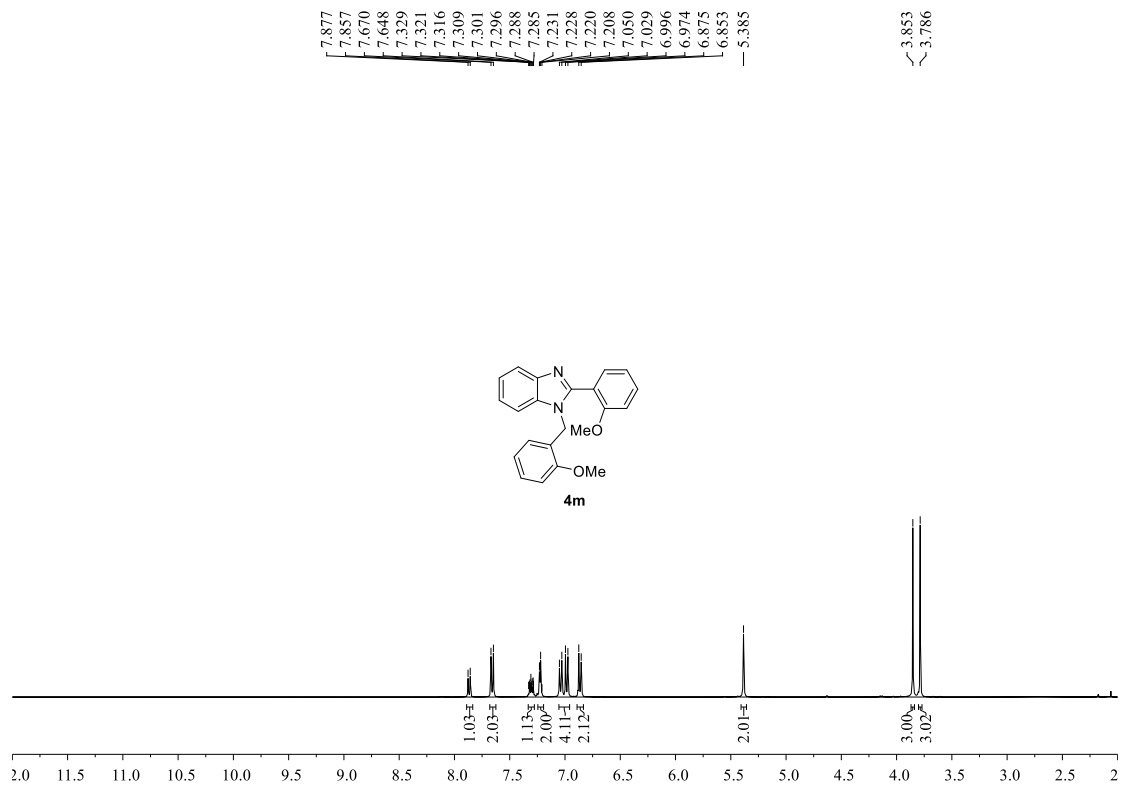

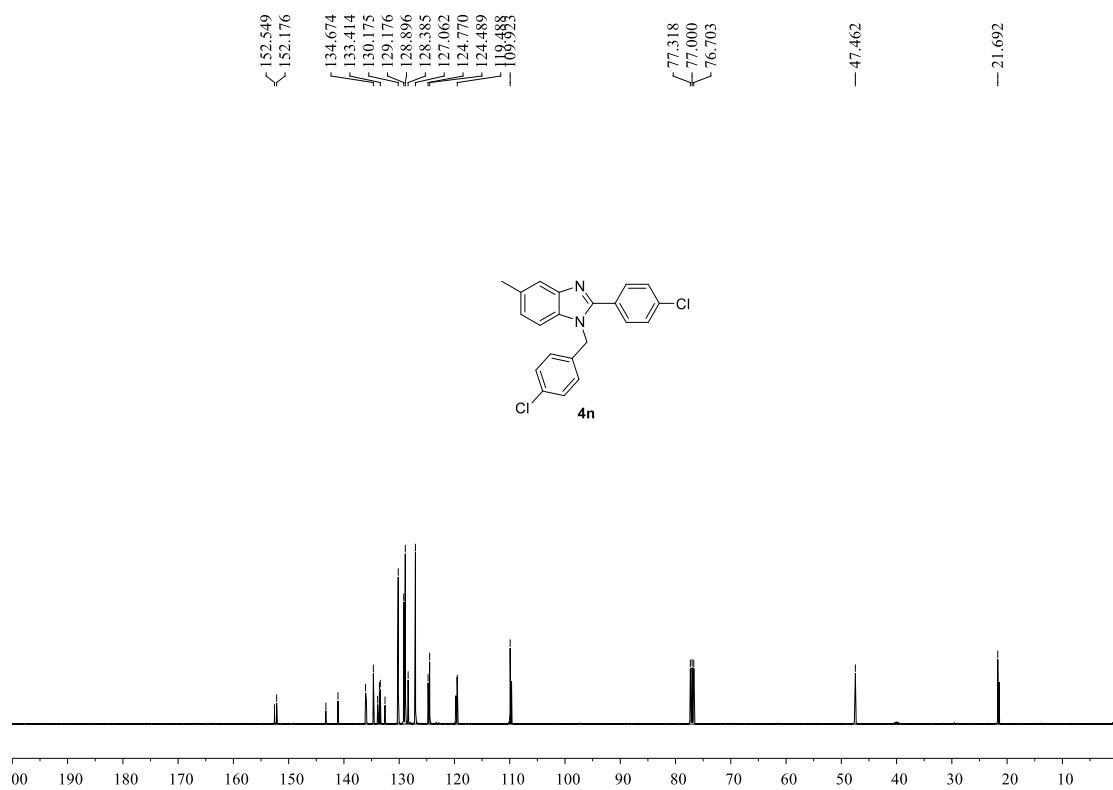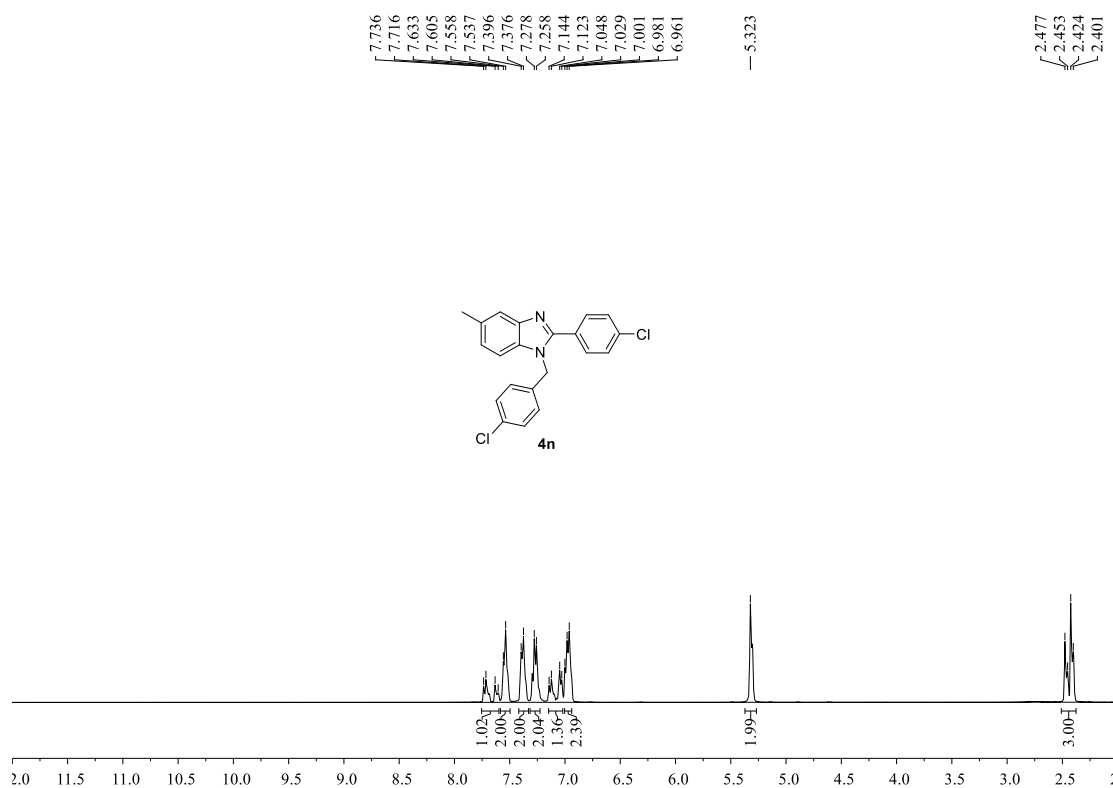

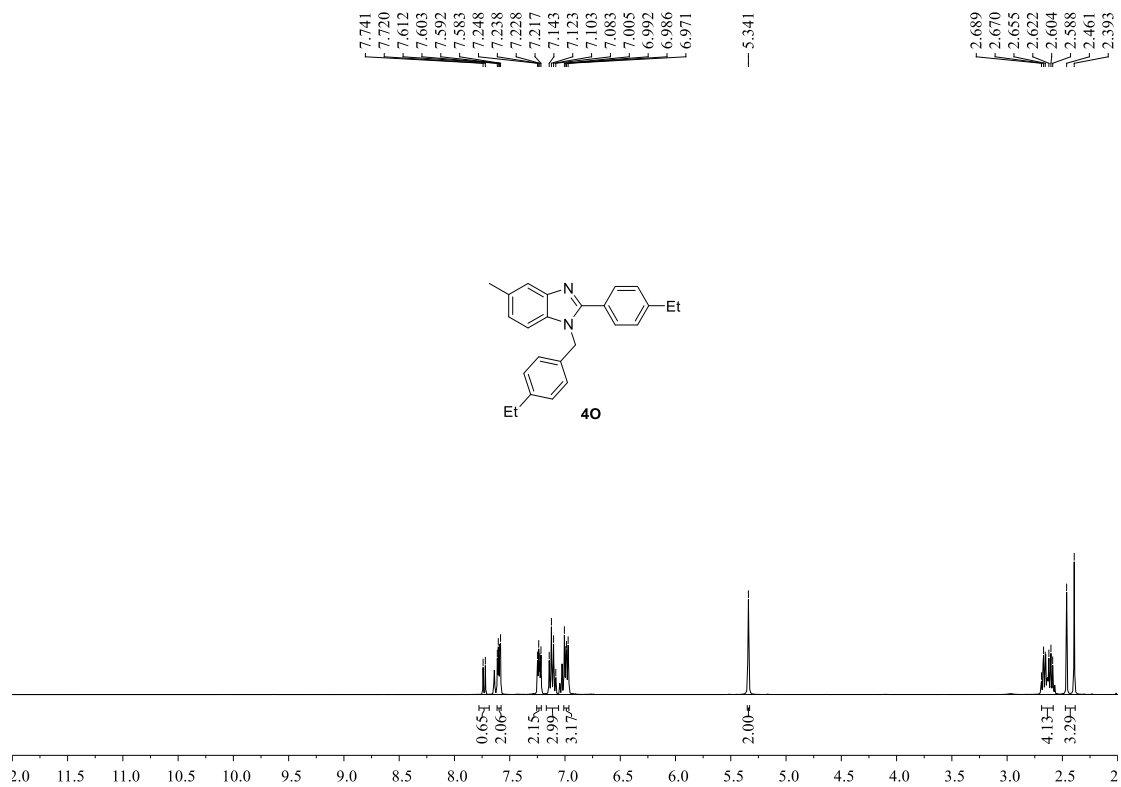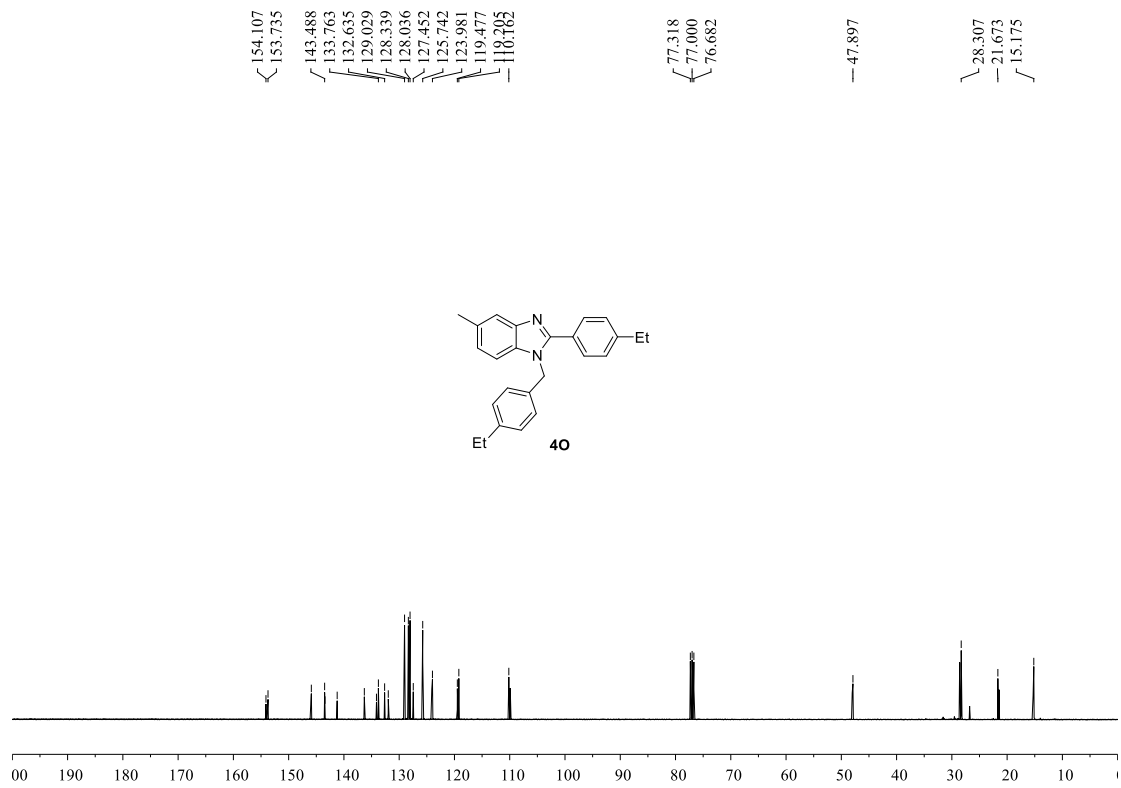

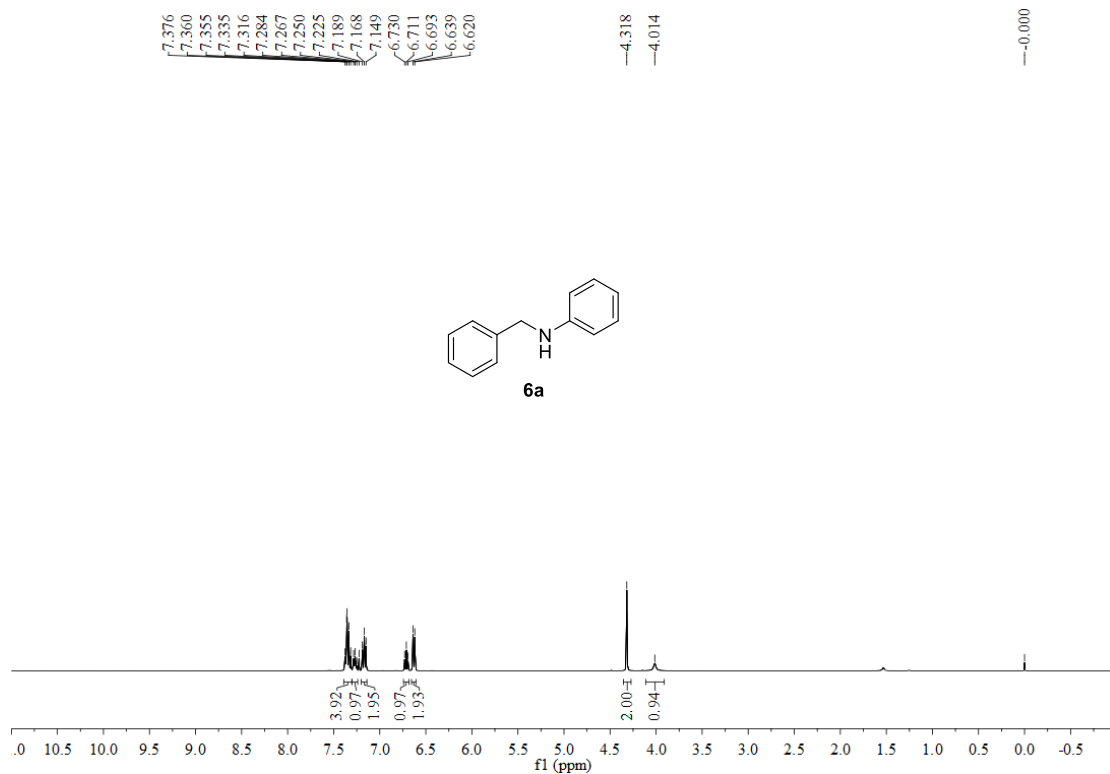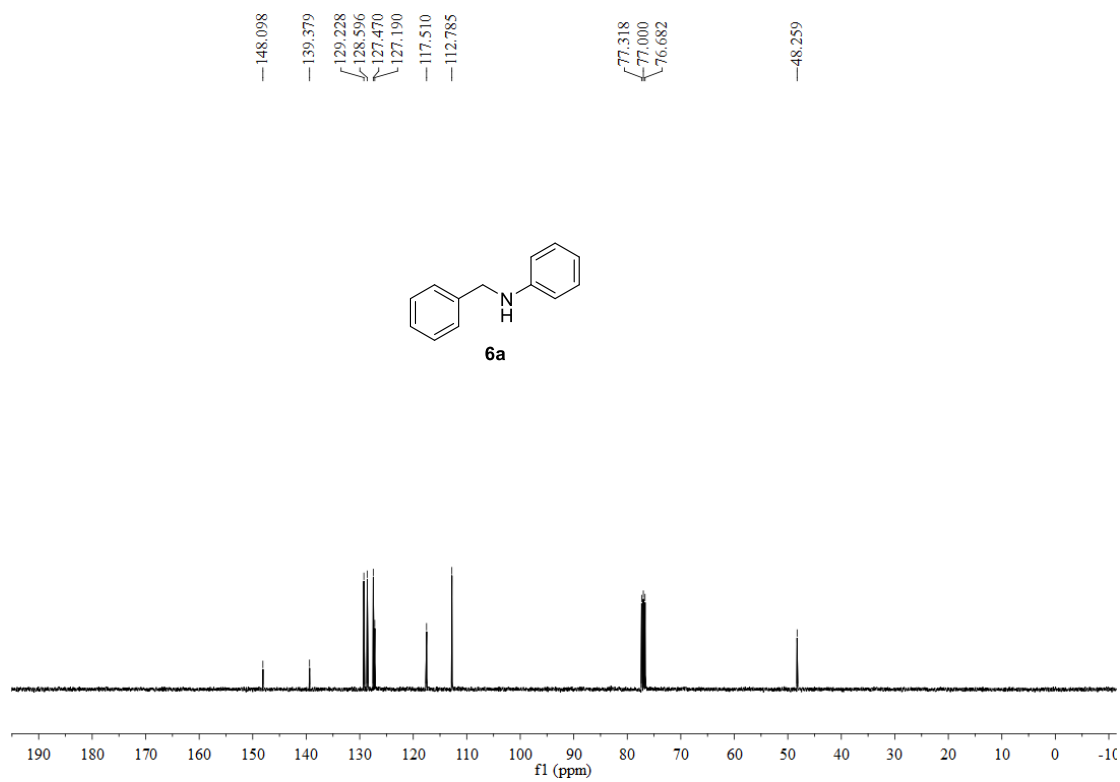

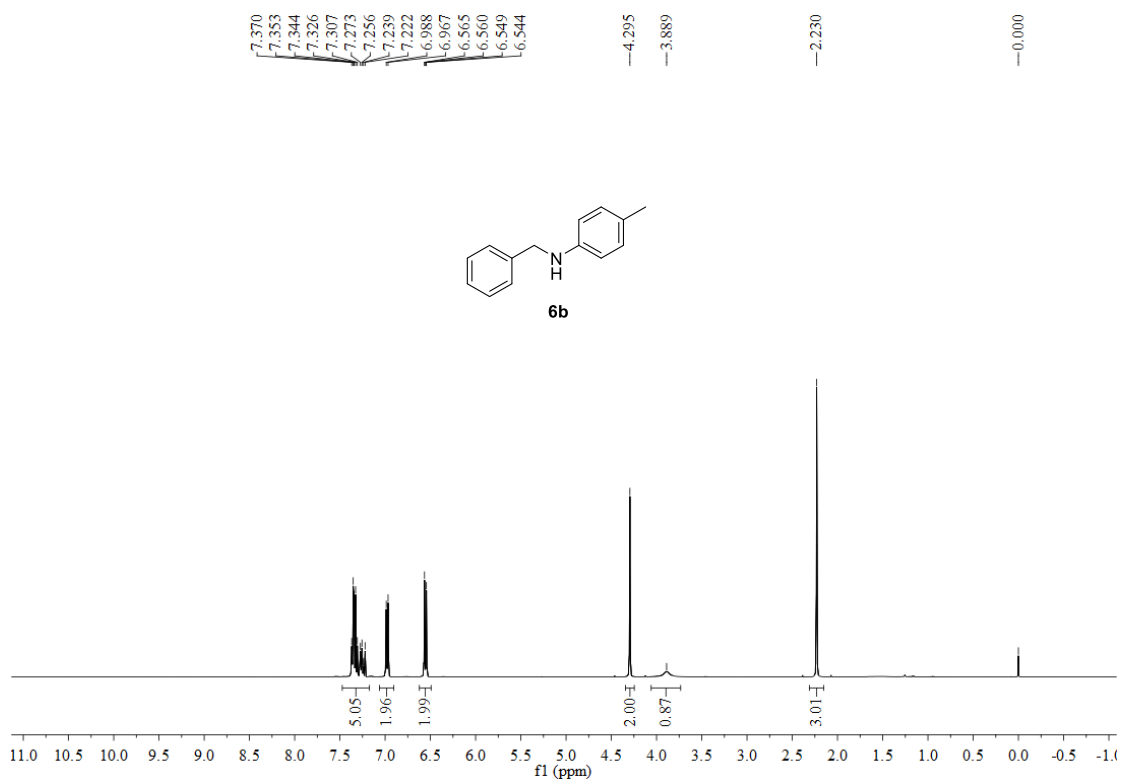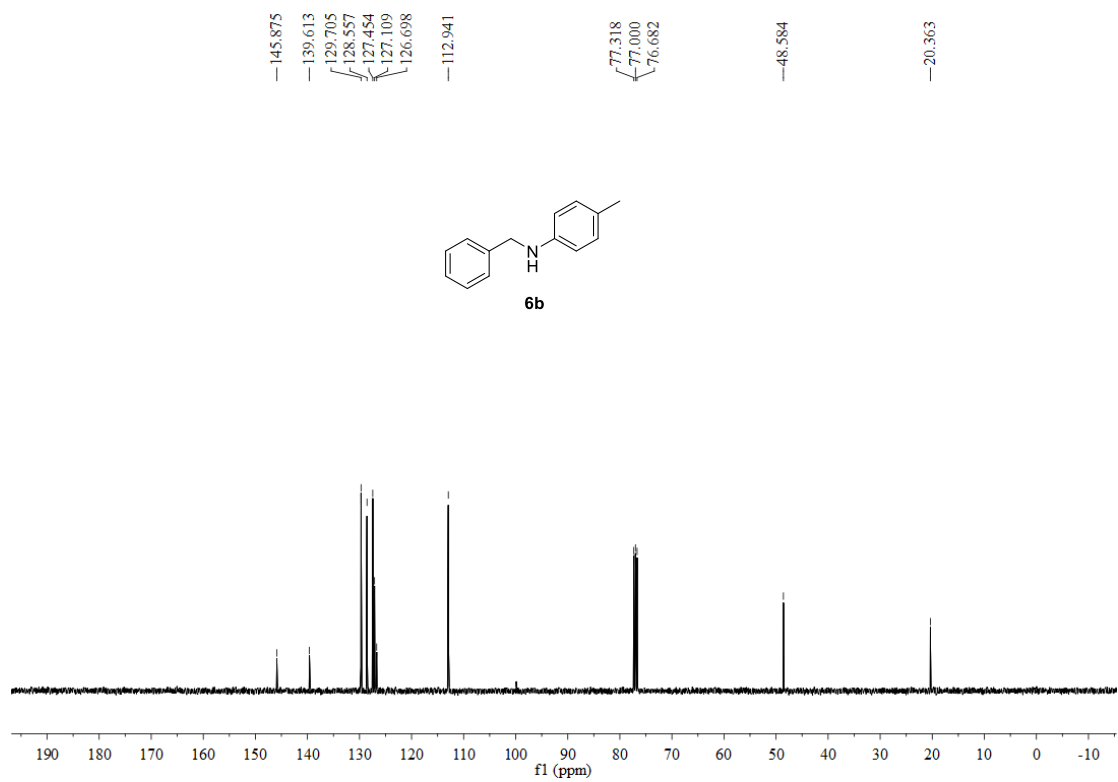



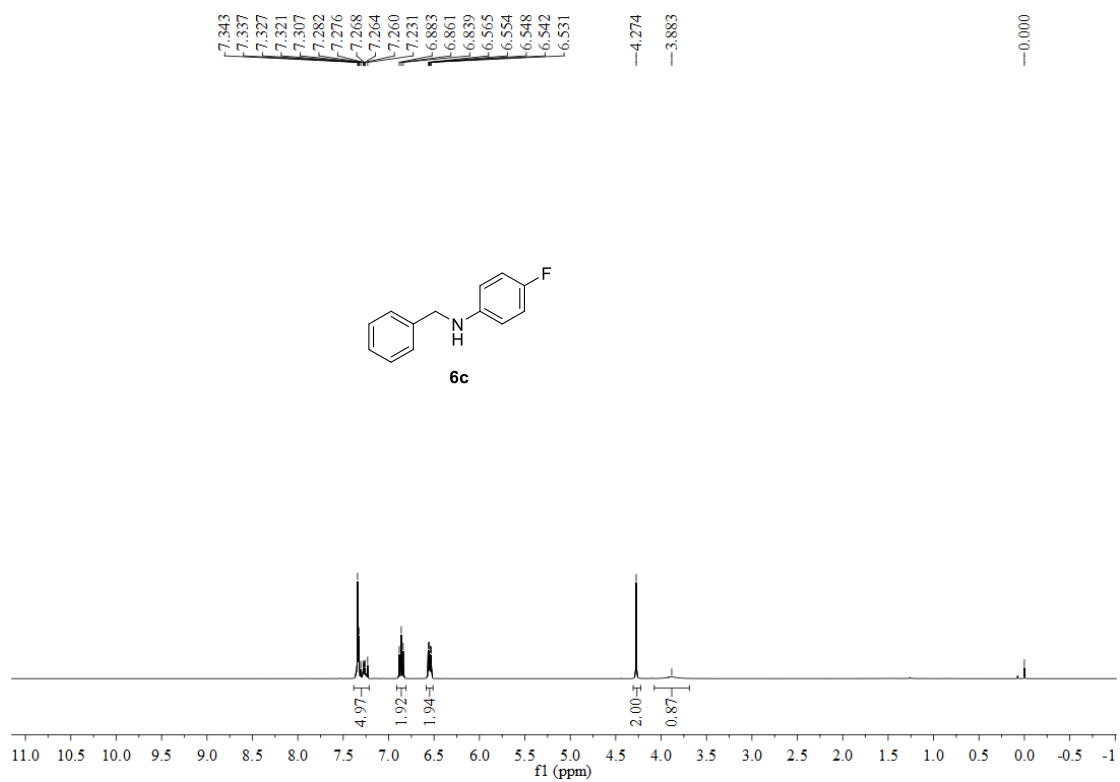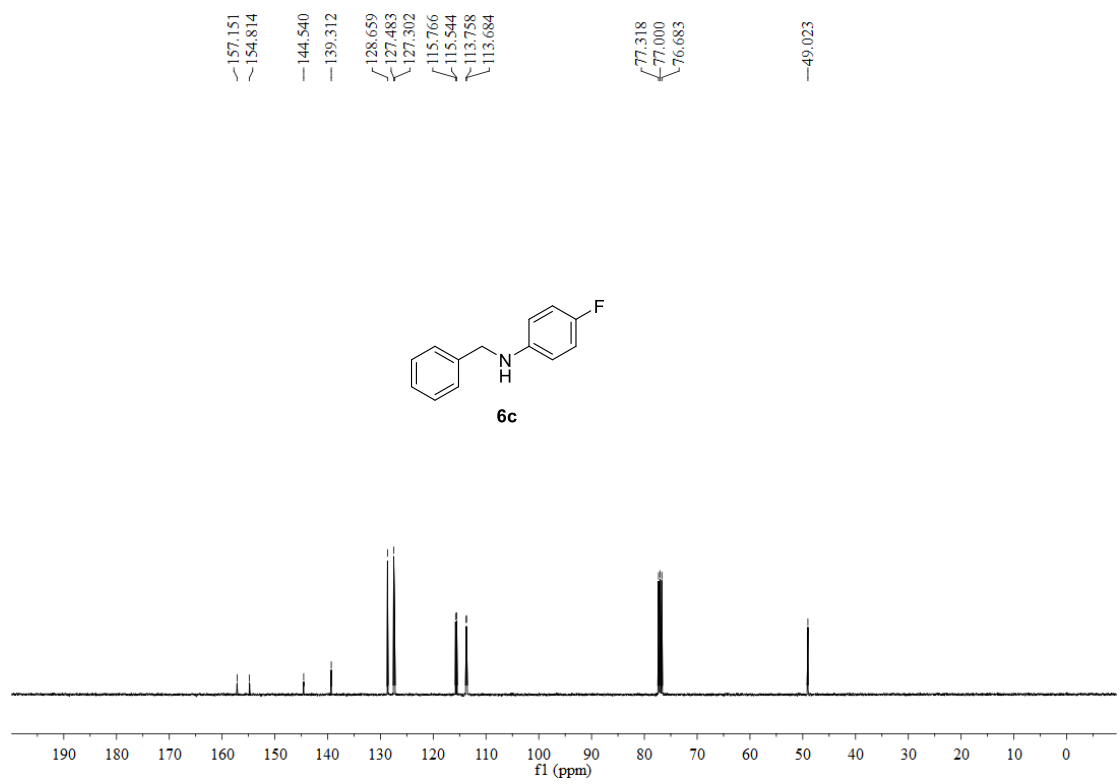

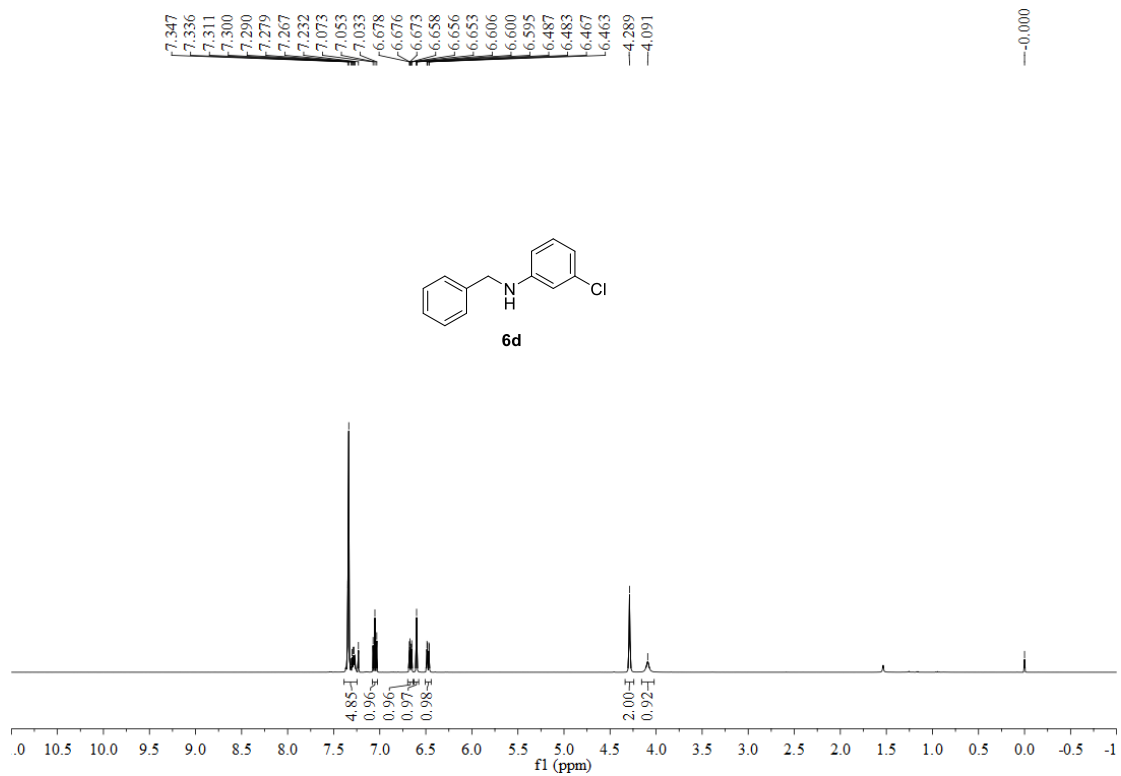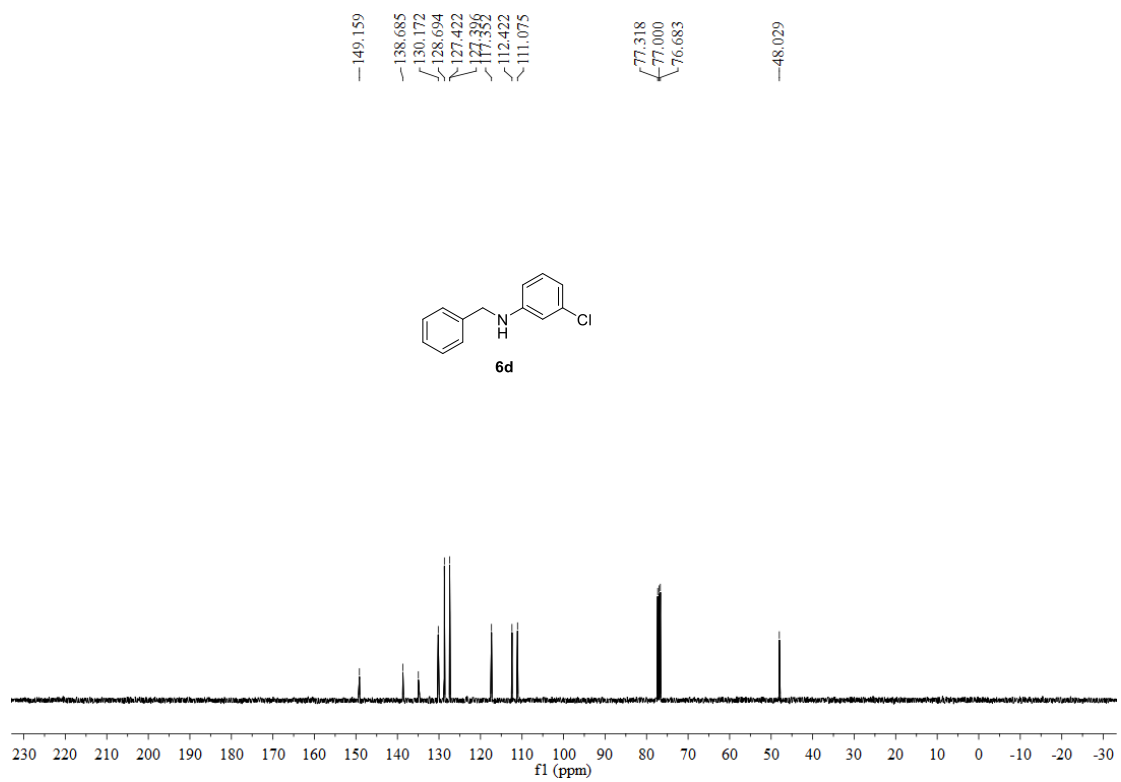

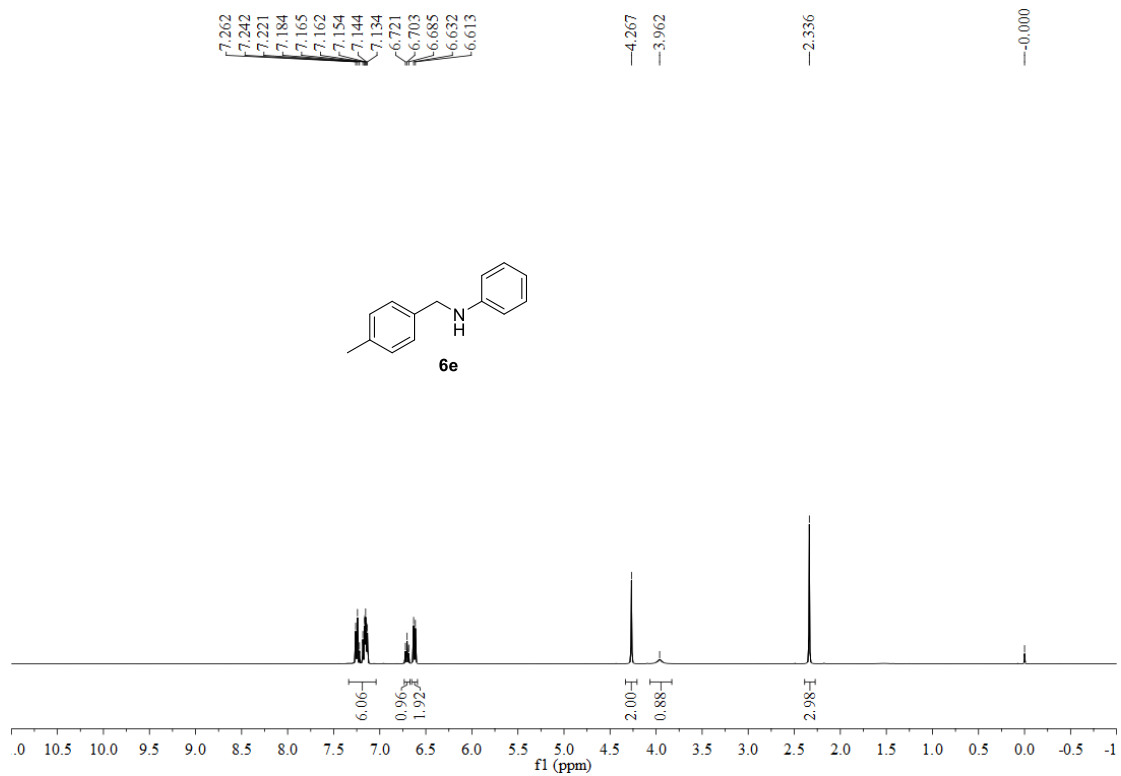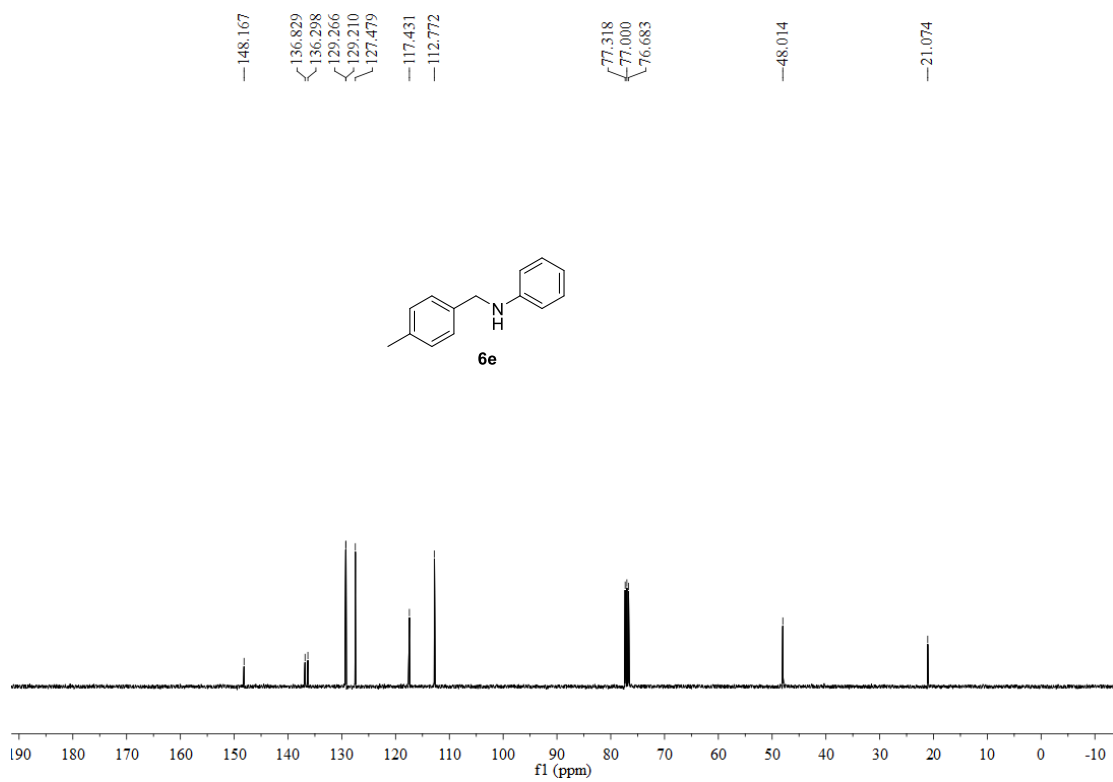

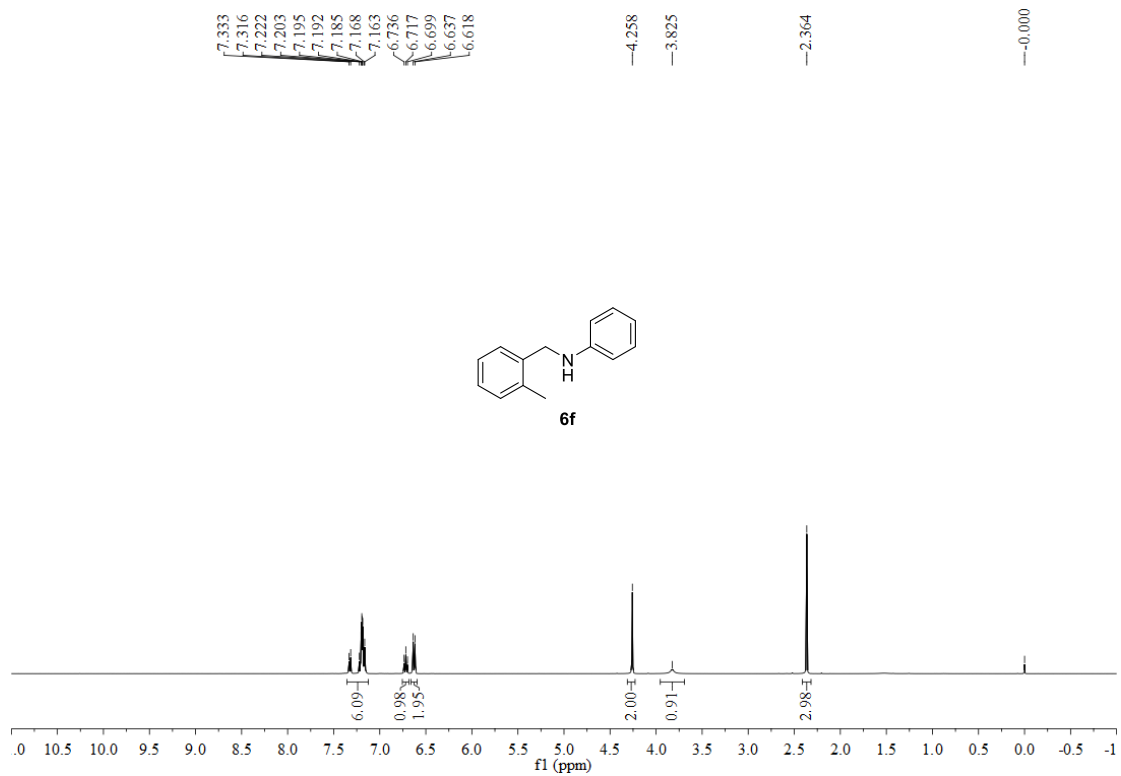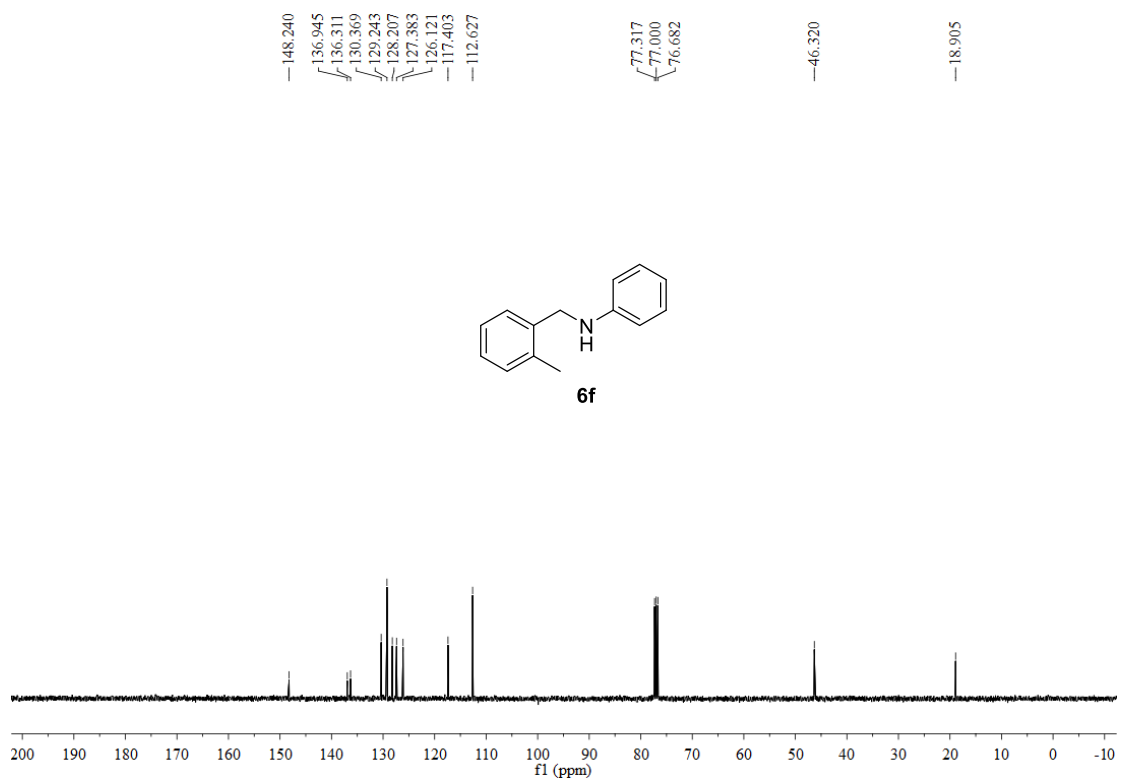

7.299  
7.189  
7.170  
7.149  
6.742  
6.724  
6.705  
6.615  
6.594

-4.306

-0.000

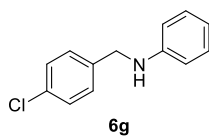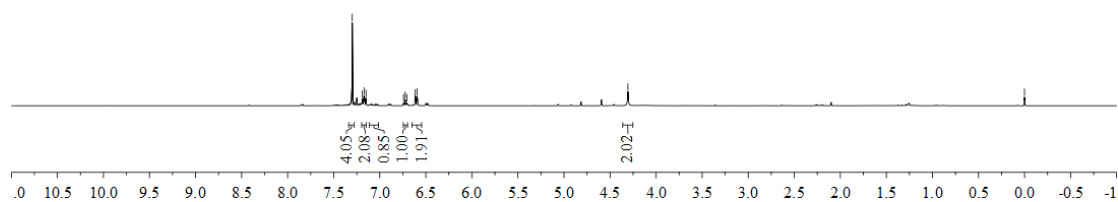

147.795  
132.845  
129.272  
128.812  
127.785  
114.089  
113.761  
112.862

77.318  
77.000  
76.683

47.584

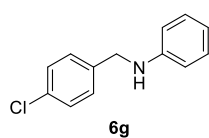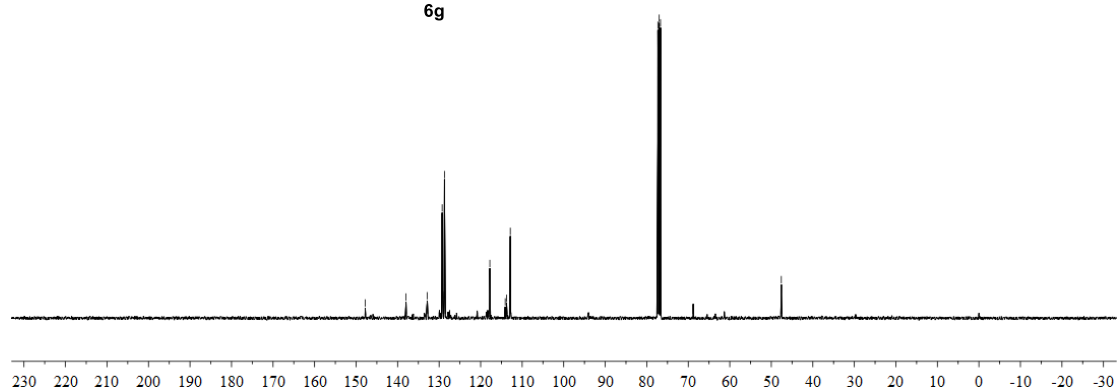

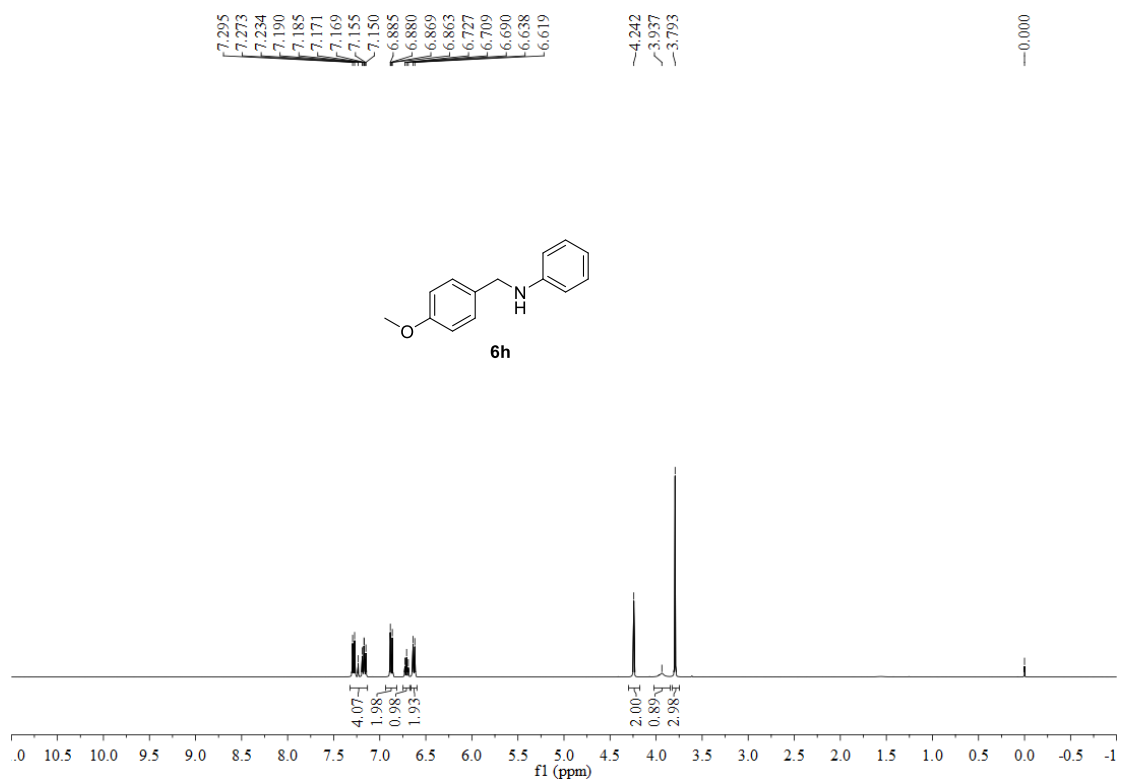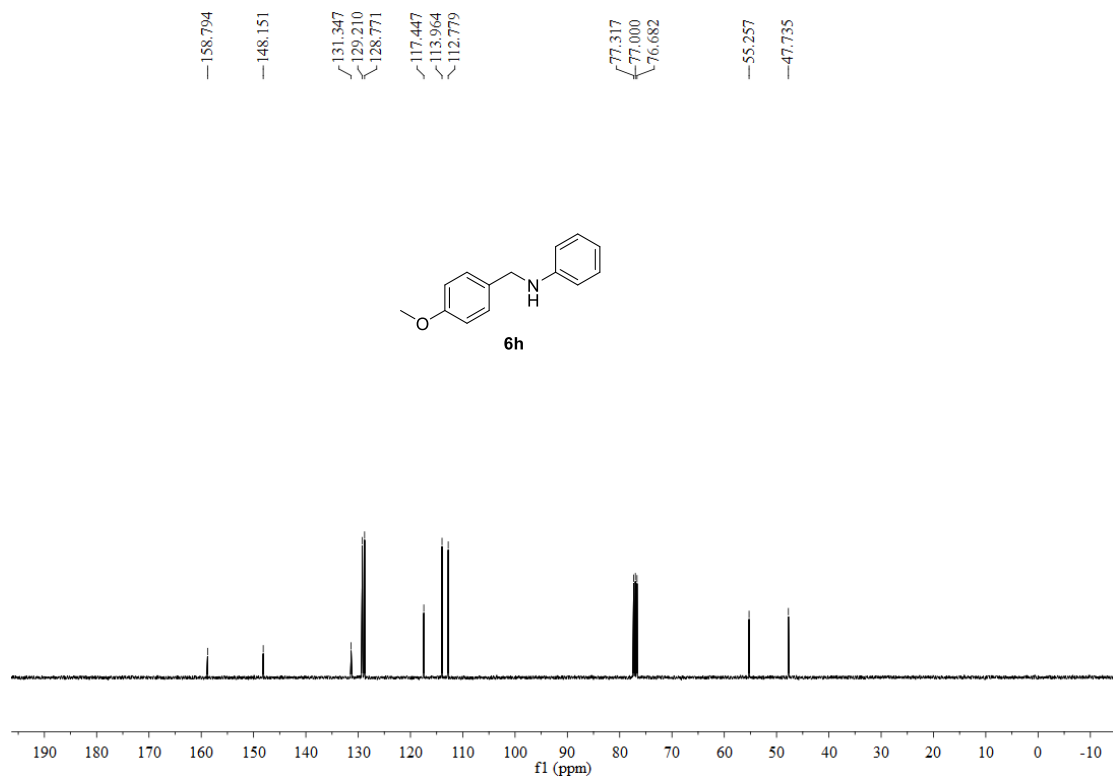

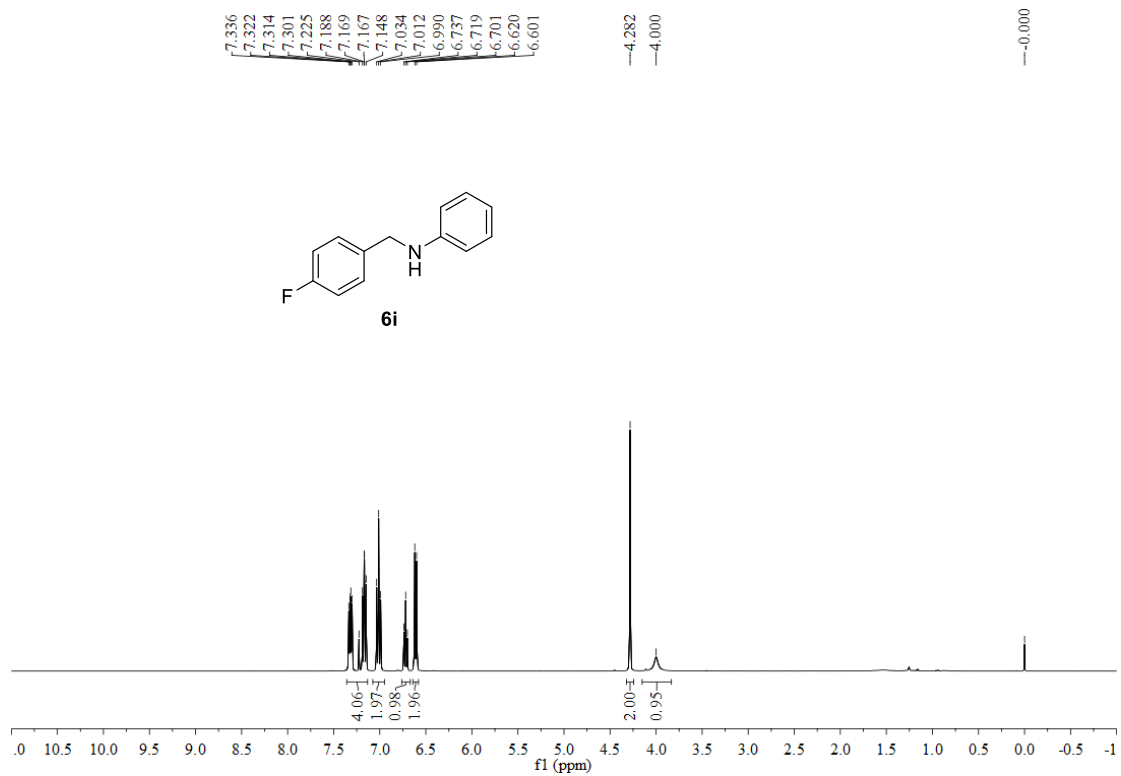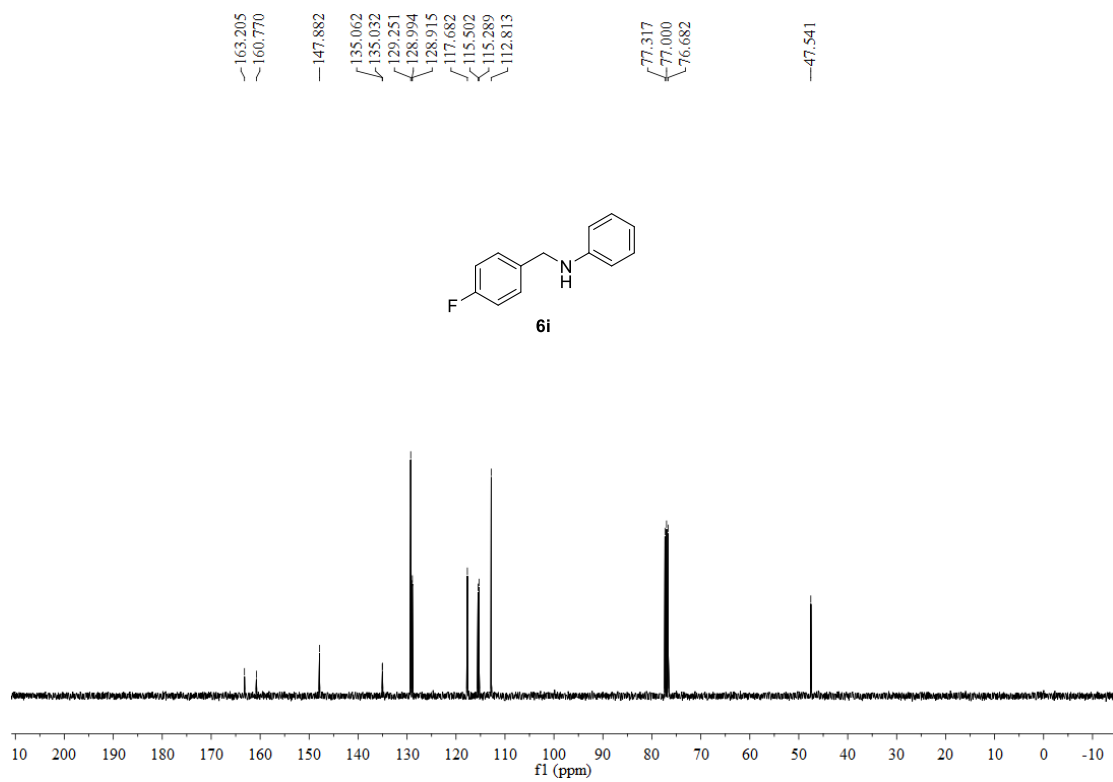

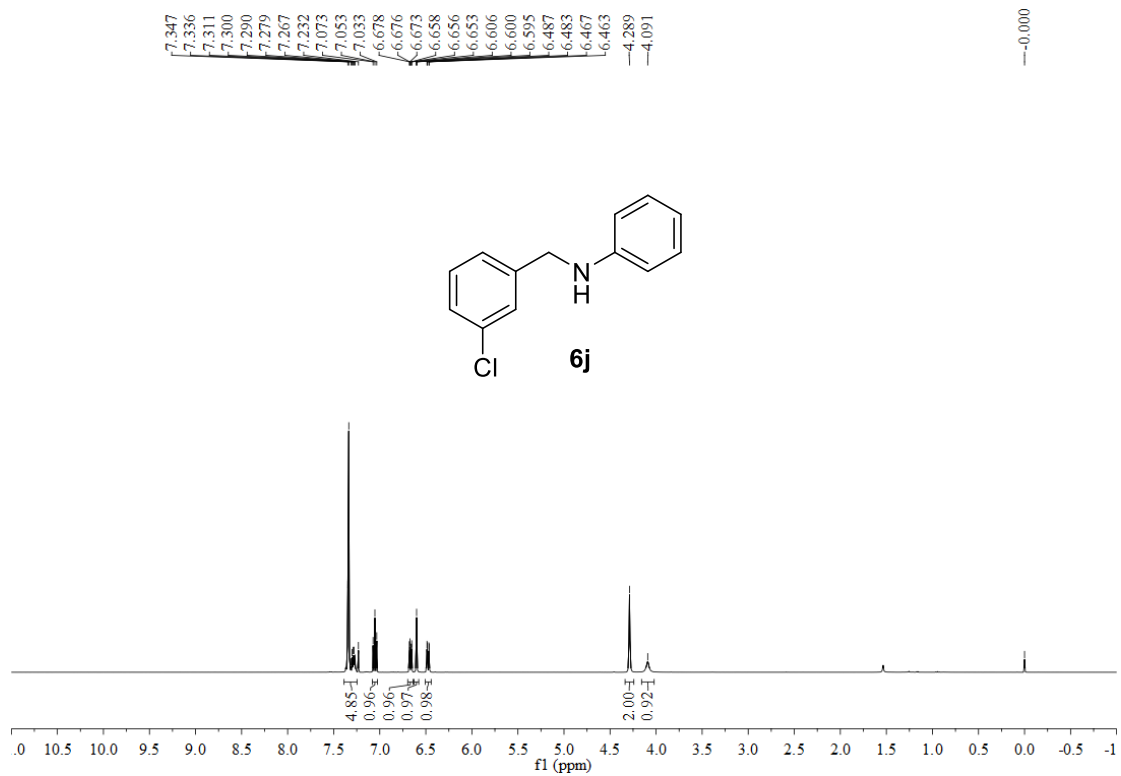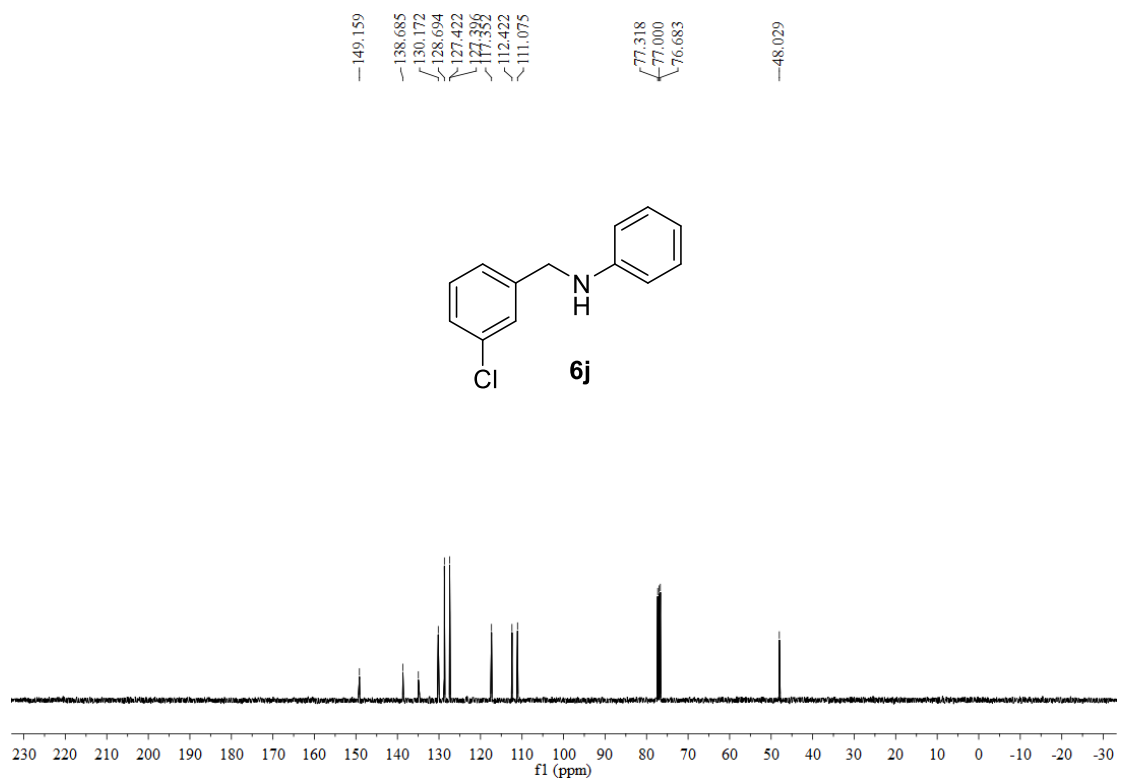



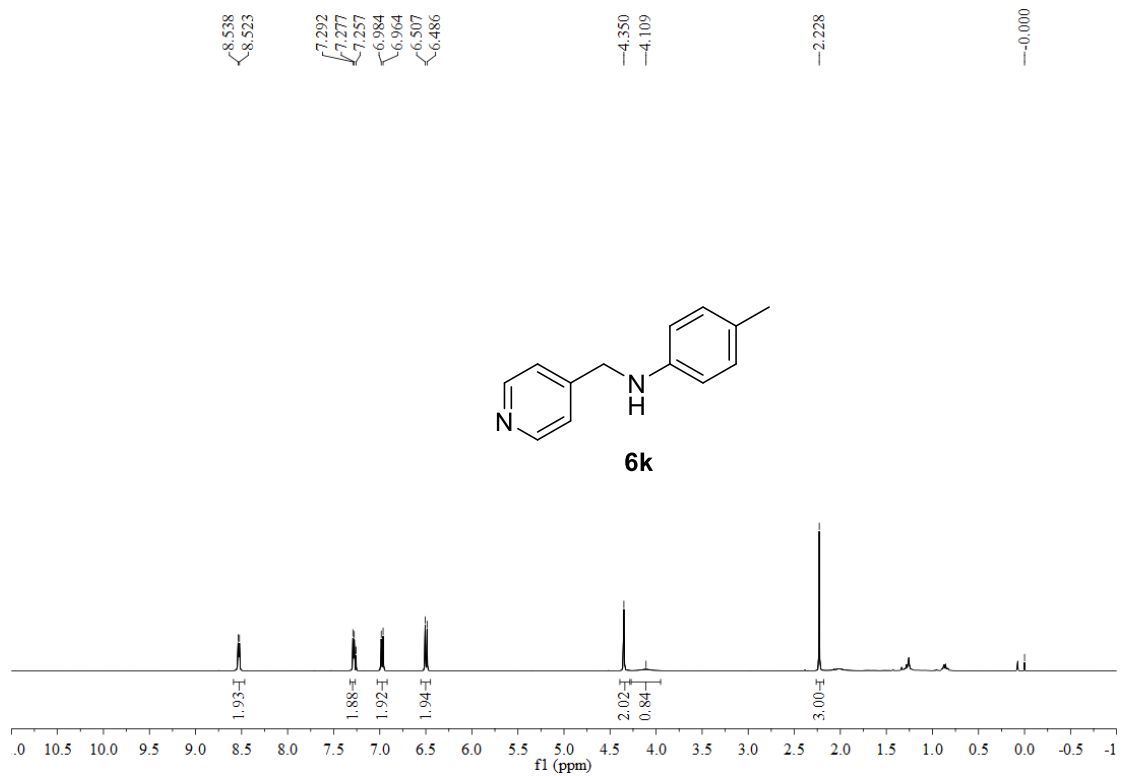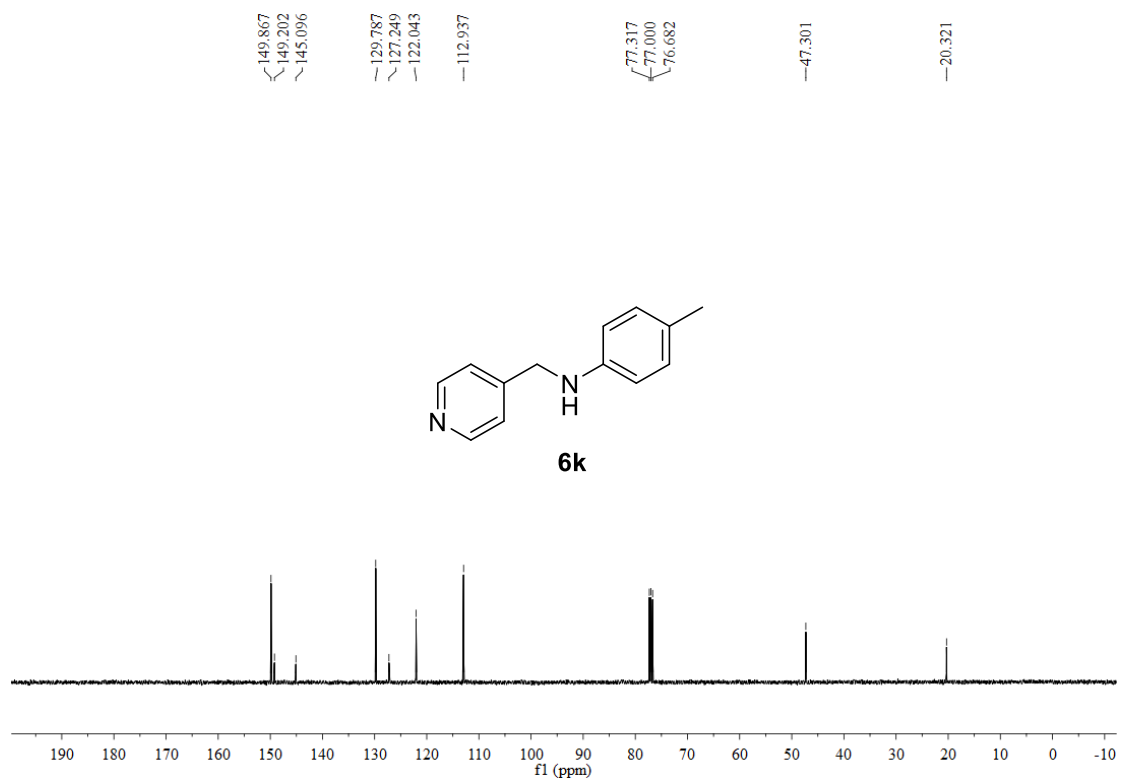

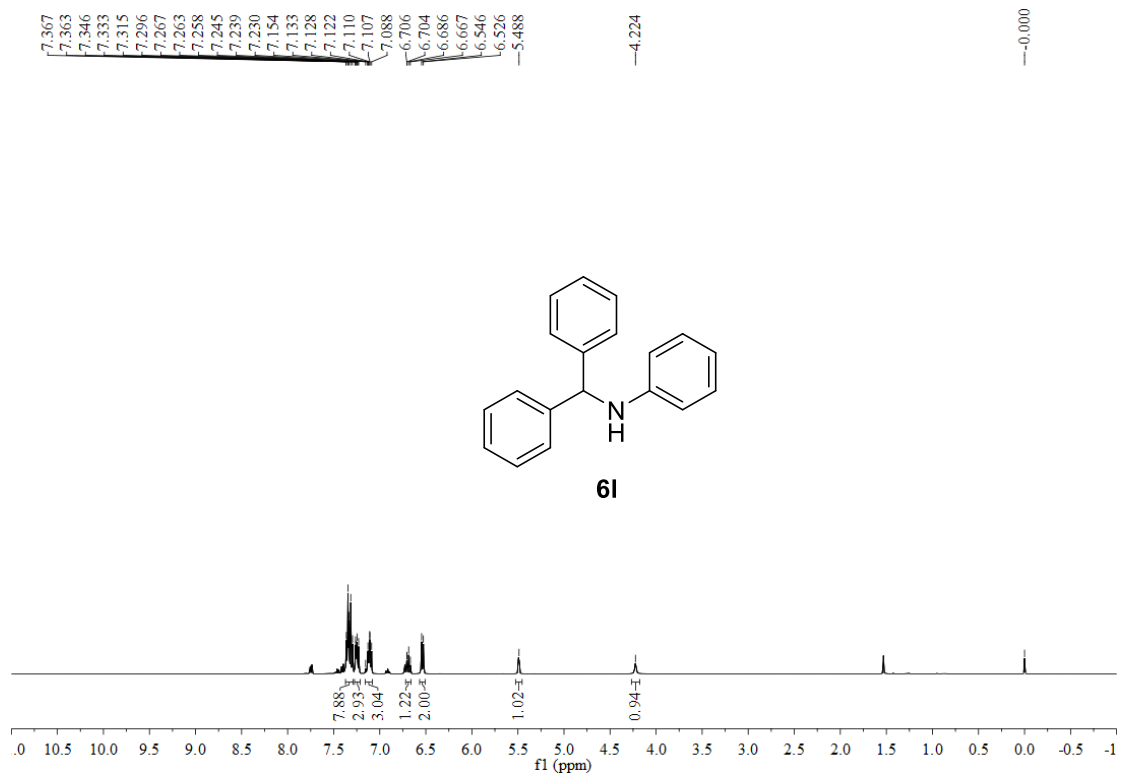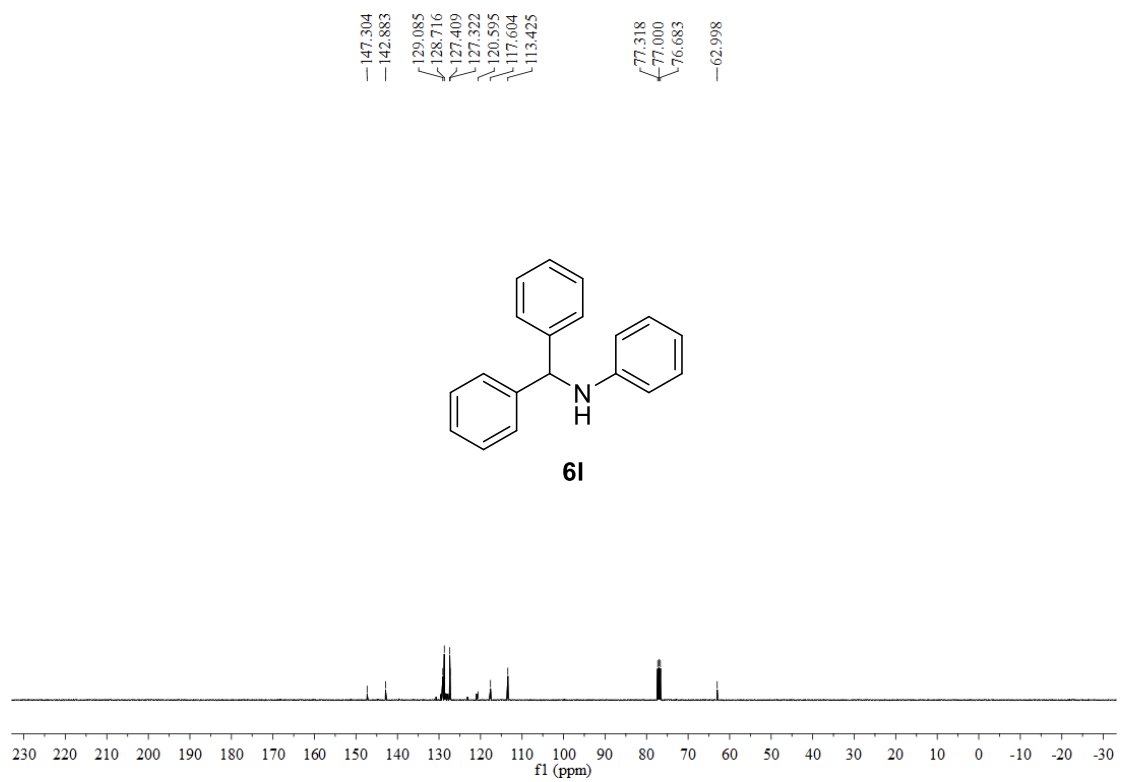

7.341  
7.325  
7.320  
7.302  
7.282  
7.230  
7.223  
7.216  
7.211  
7.204  
7.198  
7.194  
7.189  
7.092  
7.073  
7.071  
7.052

4.233  
4.216  
4.199  
4.045

1.842  
1.824  
1.810  
1.806  
1.793  
0.967  
0.948  
0.930

-0.000

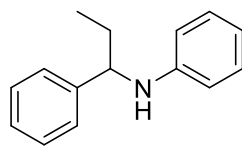

6m

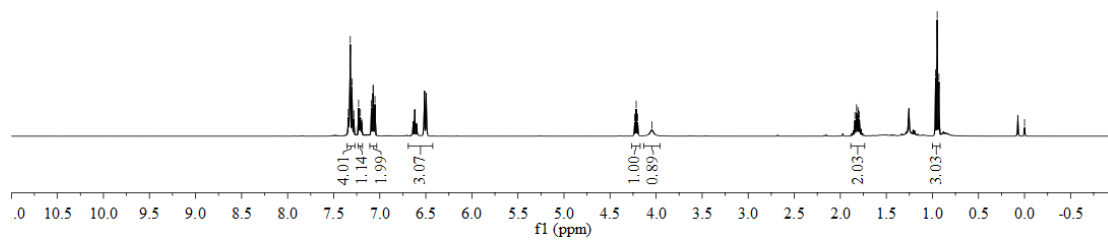

147.501  
143.899

129.050  
128.460  
126.845  
126.454  
117.092  
113.217

77.317  
77.000  
76.682

59.696

31.630

10.789

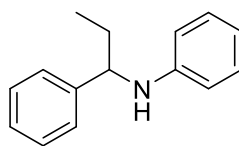

6m

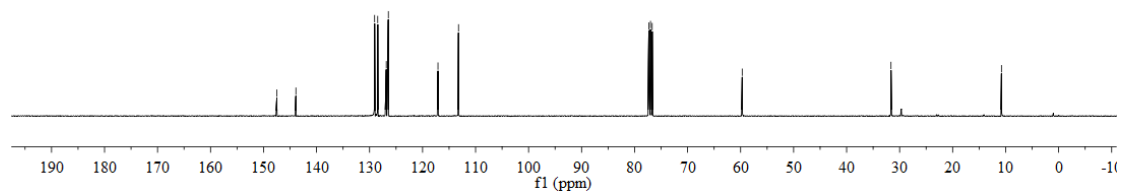

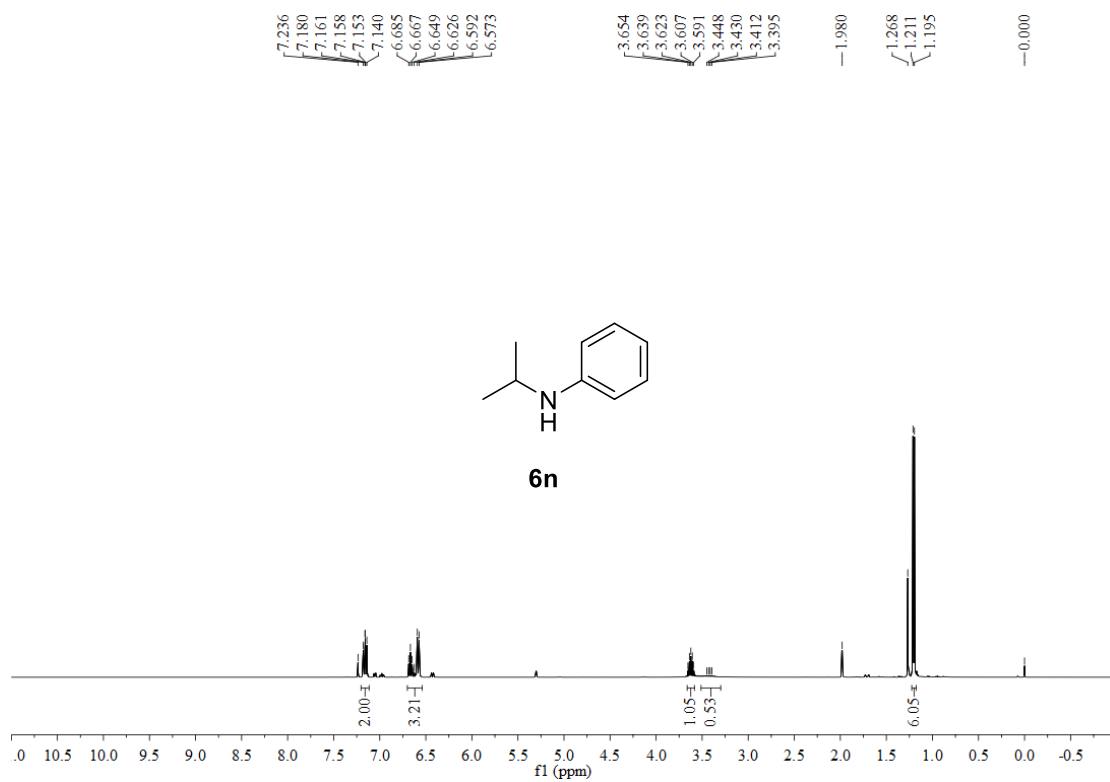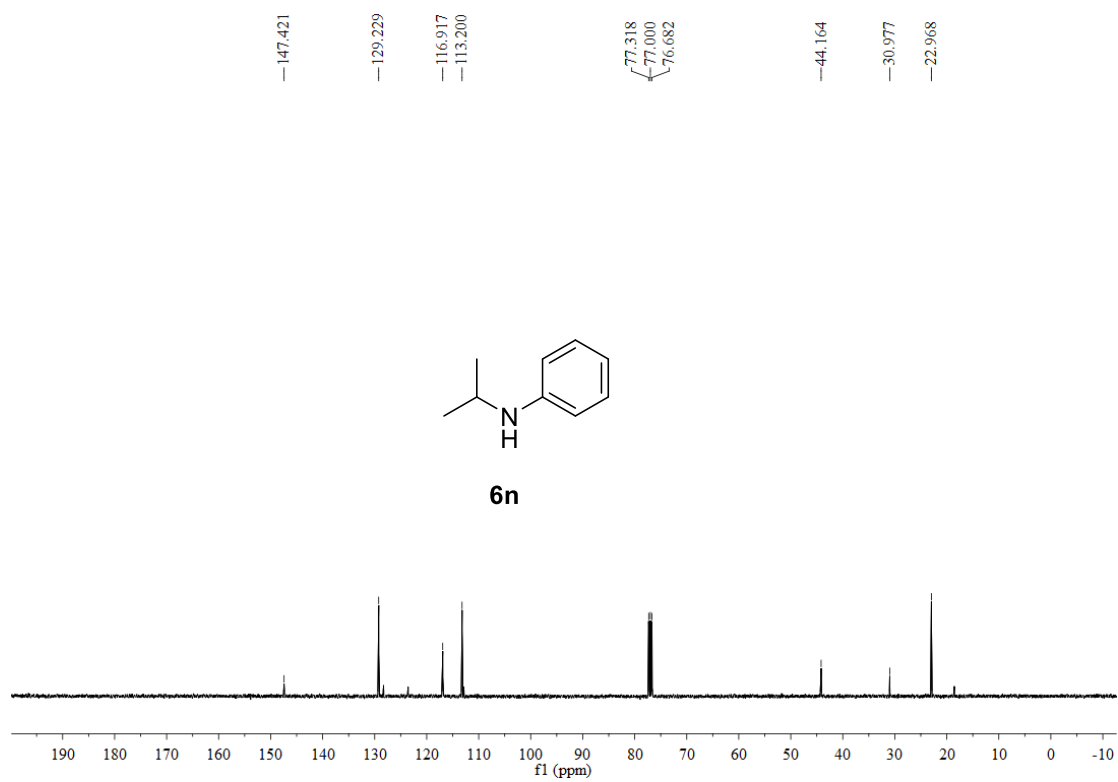

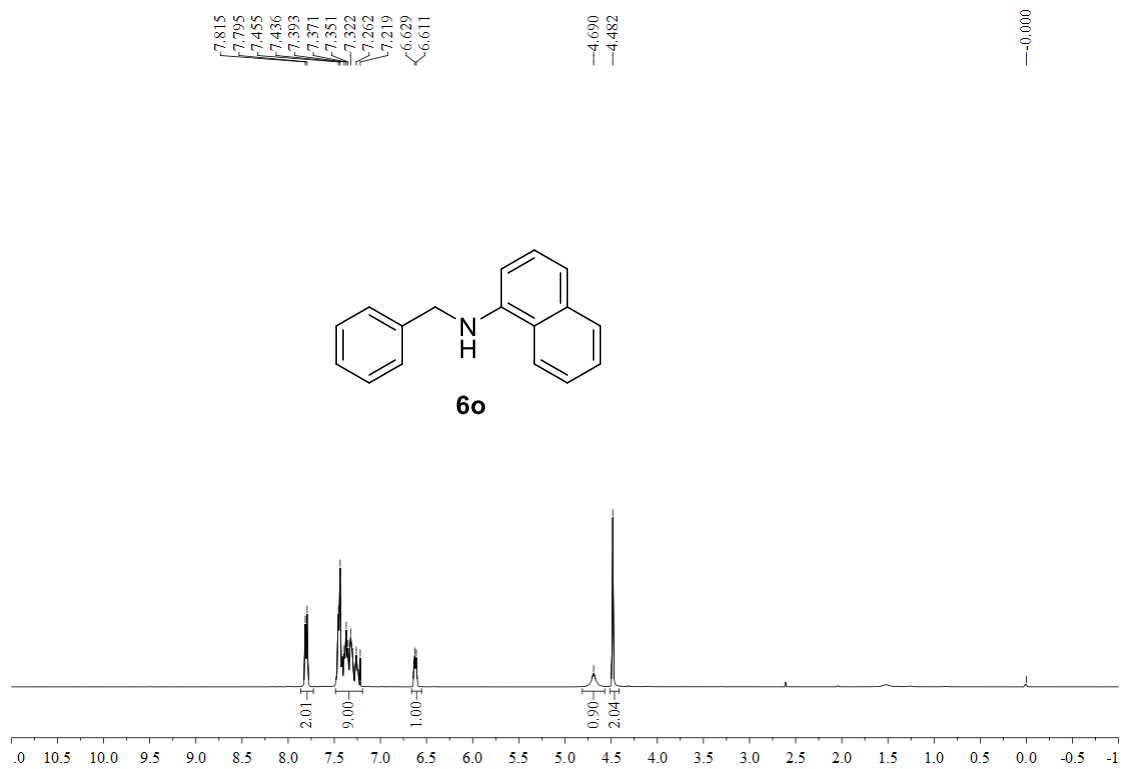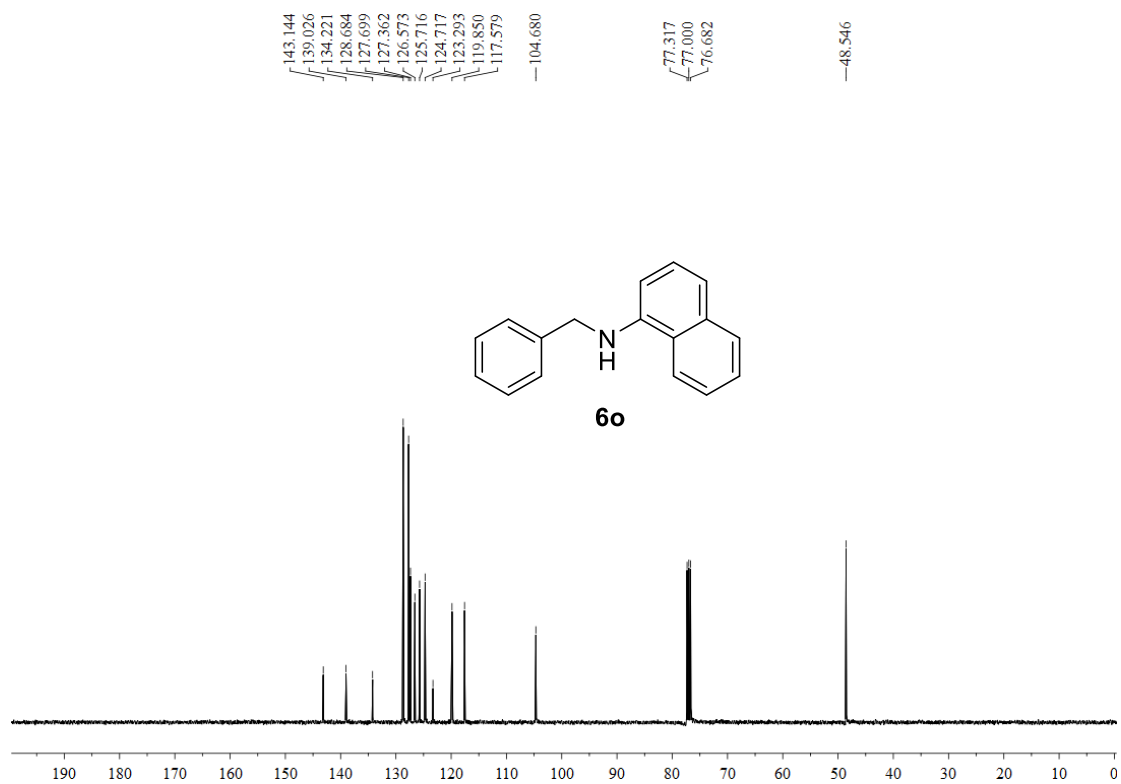

Supplement: d1nj00861g1.pdf [file d1nj00861g1.pdf]
